# Supplementary material for: Rapid review of available evidence on the serial interval and generation time of COVID-19
Source: PubMed Central journal article supplement — BMJ Open. 2020 Nov 23;10(11):e040263. doi: 10.1136/bmjopen-2020-040263 (PMC7684810; doi:10.1136/bmjopen-2020-040263), 2020-11-23

# BMJ Open

BMJ Open is committed to open peer review. As part of this commitment we make the peer review history of every article we publish publicly available.

When an article is published we post the peer reviewers' comments and the authors' responses online. We also post the versions of the paper that were used during peer review. These are the versions that the peer review comments apply to.

The versions of the paper that follow are the versions that were submitted during the peer review process. They are not the versions of record or the final published versions. They should not be cited or distributed as the published version of this manuscript.

BMJ Open is an open access journal and the full, final, typeset and author-corrected version of record of the manuscript is available on our site with no access controls, subscription charges or pay-per-view fees (<http://bmjopen.bmj.com>).

If you have any questions on BMJ Open's open peer review process please email [info.bmjopen@bmj.com](mailto:info.bmjopen@bmj.com)

# BMJ Open

## A rapid review of available evidence on the serial interval and generation time of COVID-19

|                               |                                                                                                                                                                                                                                                                                                                                                                                                                                                                                                                                                                                                                                                                                                                                                                                                                                                                                                                                                                                                                                                                                                                                                                        |
|-------------------------------|------------------------------------------------------------------------------------------------------------------------------------------------------------------------------------------------------------------------------------------------------------------------------------------------------------------------------------------------------------------------------------------------------------------------------------------------------------------------------------------------------------------------------------------------------------------------------------------------------------------------------------------------------------------------------------------------------------------------------------------------------------------------------------------------------------------------------------------------------------------------------------------------------------------------------------------------------------------------------------------------------------------------------------------------------------------------------------------------------------------------------------------------------------------------|
| Journal:                      | <i>BMJ Open</i>                                                                                                                                                                                                                                                                                                                                                                                                                                                                                                                                                                                                                                                                                                                                                                                                                                                                                                                                                                                                                                                                                                                                                        |
| Manuscript ID                 | bmjopen-2020-040263                                                                                                                                                                                                                                                                                                                                                                                                                                                                                                                                                                                                                                                                                                                                                                                                                                                                                                                                                                                                                                                                                                                                                    |
| Article Type:                 | Original research                                                                                                                                                                                                                                                                                                                                                                                                                                                                                                                                                                                                                                                                                                                                                                                                                                                                                                                                                                                                                                                                                                                                                      |
| Date Submitted by the Author: | 18-May-2020                                                                                                                                                                                                                                                                                                                                                                                                                                                                                                                                                                                                                                                                                                                                                                                                                                                                                                                                                                                                                                                                                                                                                            |
| Complete List of Authors:     | Griffin, John; University College Dublin, Centre for Veterinary Epidemiology and Risk Analysis,<br>Casey, Miriam; University College Dublin, Centre for Veterinary Epidemiology and Risk Analysis<br>Collins, Aine; University College Dublin, Centre for Veterinary Epidemiology and Risk Analysis; Government of Ireland Department of Agriculture Food and the Marine<br>Hunt, Kevin; University College Dublin, Centre for Food Safety<br>McEvoy, David; University College Dublin, School of Public Health, Physiotherapy and Sports Science<br>Byrne, Andrew; Government of Ireland Department of Agriculture Food and the Marine, One Health Scientific Support Unit<br>McAloon, Conor; UCD School of Agriculture Food Science and Veterinary Medicine, School of Veterinary Medicine<br>Barber, Ann; University College Dublin, Centre for Veterinary Epidemiology and Risk Analysis<br>Lane, Elizabeth; University College Dublin, Centre for Veterinary Epidemiology and Risk Analysis,; Government of Ireland Department of Agriculture Food and the Marine<br>More, SImon; University College Dublin, Centre for Veterinary Epidemiology and Risk Analysis |
| Keywords:                     | Epidemiology < INFECTIOUS DISEASES, Epidemiology < TROPICAL MEDICINE, Infection control < INFECTIOUS DISEASES                                                                                                                                                                                                                                                                                                                                                                                                                                                                                                                                                                                                                                                                                                                                                                                                                                                                                                                                                                                                                                                          |
|                               |                                                                                                                                                                                                                                                                                                                                                                                                                                                                                                                                                                                                                                                                                                                                                                                                                                                                                                                                                                                                                                                                                                                                                                        |

SCHOLARONE™  
Manuscripts

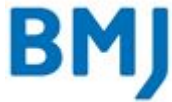

I, the Submitting Author has the right to grant and does grant on behalf of all authors of the Work (as defined in the below author licence), an exclusive licence and/or a non-exclusive licence for contributions from authors who are: i) UK Crown employees; ii) where BMJ has agreed a CC-BY licence shall apply, and/or iii) in accordance with the terms applicable for US Federal Government officers or employees acting as part of their official duties; on a worldwide, perpetual, irrevocable, royalty-free basis to BMJ Publishing Group Ltd ("BMJ") its licensees and where the relevant Journal is co-owned by BMJ to the co-owners of the Journal, to publish the Work in this journal and any other BMJ products and to exploit all rights, as set out in our [licence](#).

The Submitting Author accepts and understands that any supply made under these terms is made by BMJ to the Submitting Author unless you are acting as an employee on behalf of your employer or a postgraduate student of an affiliated institution which is paying any applicable article publishing charge ("APC") for Open Access articles. Where the Submitting Author wishes to make the Work available on an Open Access basis (and intends to pay the relevant APC), the terms of reuse of such Open Access shall be governed by a Creative Commons licence – details of these licences and which [Creative Commons](#) licence will apply to this Work are set out in our licence referred to above.

Other than as permitted in any relevant BMJ Author's Self Archiving Policies, I confirm this Work has not been accepted for publication elsewhere, is not being considered for publication elsewhere and does not duplicate material already published. I confirm all authors consent to publication of this Work and authorise the granting of this licence.

## A rapid review of available evidence on the serial interval and generation time of COVID-19

John Griffin<sup>1</sup>, Miriam Casey<sup>1</sup>, Áine B. Collins<sup>1,7</sup>, Kevin Hunt<sup>2</sup>, David Mc Evoy<sup>3</sup>, Andrew W. Byrne<sup>4</sup>, Conor G. McAloon<sup>5</sup>, Ann Barber<sup>1</sup>, Elizabeth Ann Lane<sup>1,6</sup> and Simon J. More<sup>1</sup>

<sup>1</sup>Centre for Veterinary Epidemiology and Risk Analysis, UCD School of Veterinary Medicine, University College Dublin, Belfield, Dublin D04 W6F6, Ireland.

<sup>2</sup>School of Biosystems and Food Engineering, University College Dublin, Belfield, Dublin 4, Ireland

<sup>3</sup>School of Public Health, Physiotherapy and Sports Science, University College Dublin, Belfield, Dublin 4, Ireland

<sup>4</sup>One Health Scientific Support Unit, Department of Agriculture, Food and the Marine (DAFM), Kildare Street, Dublin 2, Ireland

<sup>5</sup>Section of Herd Health and Animal Husbandry, UCD School of Veterinary Medicine, University College Dublin, Dublin D04 W6F6, Ireland.

<sup>6</sup>Department of Agriculture, Food and the Marine, Backweston Campus, Co. Kildare, W23 X3PH.

<sup>7</sup>Department of Agriculture, Food and the Marine, Kildare St., Dublin 2, Ireland

**Correspondence to:** John Griffin, [johnmgriffin@live.com](mailto:johnmgriffin@live.com), Centre for Veterinary Epidemiology and Risk Analysis, UCD School of Veterinary Medicine, University College Dublin, Belfield, Dublin D04 W6F6, Ireland

**Key words:** “COVID-19”; ‘SARS-CoV-2’; “serial interval”; “generation time”; generation interval

### Abstract:

The serial interval is the time between symptom onsets in an infector-infectee pair. The generation time, also known as the generation interval, is the time between infection events in an infector-infectee pair. The serial interval and the generation time are key parameters for assessing the dynamics of a disease. A number of scientific papers reported information pertaining to the serial interval and/or generation time for COVID-19.

**Objectives:** Conduct a rapid review of available evidence to advise on appropriate parameter values for serial interval and generation time in national COVID-19 transmission models for Ireland and on methodological issues relating to those parameters.

**Methods:** A review of scientific literature was conducted covering the period between December 1, 2019 and April 27, 2020. Nineteen scientific papers were evaluated in detail from 27 papers that contained information on the serial interval and/or generation time for COVID-19.

**Results:** The mean of the serial interval ranged from 3.1 to 7.5 days, based on 22 estimates, and the median from 1.9 to 6.0 days (based on 7 estimates). Only three estimates were provided

1  
2  
3 for the mean of the generation time. These ranged from 3.9 to 5.2 days. One estimate of 5.0  
4 days was provided for the median of the generation time.  
5

6 **Discussion:** The values of the estimates for serial interval and generation time are heavily  
7 influenced by the contact rates between infectious and susceptible individuals. Mitigation  
8 measures that are introduced in a country or region are of paramount importance in this regard.  
9 The serial interval estimate of 6.6 days (95% confidence interval: 0.7 – 19.0) from the paper by  
10 Cereda et al.[10] is likely to be the most relevant to European countries. National estimates  
11 should be obtained as soon as possible.  
12

### 13 **Strengths and limitations of this study**

- 14 • The study provides timely information on serial interval and generation time for those  
15 involved in the development of models and in the implementation of control measures  
16 against COVID-19.
- 17 • This is a rapid review of available evidence in the scientific literature between December  
18 1, 2019 and April 27, 2020 on the serial interval and/or the generation time and it contains  
19 the usual limitations associated with such a review.
- 20 • Eleven of the 19 papers reviewed in detail were pre-print articles.
- 21 • The statistical methods used in the different papers were not analysed in detail.  
22  
23  
24  
25

### 26 **Introduction**

27 In response to the coronavirus (COVID-19) outbreak, the Irish Epidemiological Modelling  
28 Advisory Group (IEMAG) for COVID-19 was established to assist the Irish National Public  
29 Health Emergency Team (NPHET) in their decision-making during the pandemic. A  
30 subcommittee from IEMAG was tasked with researching the various parameters, leading to the  
31 development of a series of synthesis documents relevant to the parameterisation of a COVID-  
32 19 transmission model for Ireland.  
33

34  
35 The serial interval is the time between symptom onsets in an infector-infectee pair, i.e. the  
36 interval between the onset of symptoms in an infectee and its presumed infector. This can be a  
37 negative number if the onset of symptoms in the infectee occurs prior to the onset of symptoms  
38 in the infector. The generation time, also known as the generation interval, is the time between  
39 infection events in an infector-infectee pair. The serial interval and the generation time are key  
40 parameters for assessing the dynamics of a disease. The generation time or its proxy, the serial  
41 interval, is an essential quantity for determining the reproduction number.  
42

43 A number of scientific papers reported information pertaining to the serial interval and/or  
44 generation time for COVID-19. In the context of national control efforts in Ireland, our  
45 objective was to conduct a rapid review of available evidence to advise the IEMAG on the  
46 appropriate parameter values for serial interval or generation time in national COVID-19  
47 transmission models and on methodological issues relating to those parameters. This  
48 information may also be of use to developers of models and those involved in the  
49 implementation of control programmes in other countries.  
50

### 51 **Material and methods**

52  
53 The guidelines in the protocol “Rapid reviews to strengthen health policy and systems: A  
54 practical guide” produced by the World Health Organization were used for carrying out this  
55 review. This can be accessed at  
56 [https://apps.who.int/iris/bitstream/handle/10665/258698/9789241512763-  
57 eng.pdf;jsessionid=E033D9A6E3118CE0701D03815D63F648?sequence=1](https://apps.who.int/iris/bitstream/handle/10665/258698/9789241512763-eng.pdf;jsessionid=E033D9A6E3118CE0701D03815D63F648?sequence=1). The PRISMA-  
58  
59  
60

ScR checklist (<https://www.equator-network.org/wp-content/uploads/2018/09/PRISMA-ScR-Fillable-Checklist-1.pdf>) for scoping reviews was also used.

We conducted a review of the literature between December 1, 2019 and April 27, 2020 for all countries. Publications on the electronic databases PubMed, Google Scholar, MedRxiv and BioRxiv were searched with the following keywords: “Novel coronavirus” OR “SARS-CoV-2” OR “2019-nCoV” OR “COVID-19” AND “serial interval” OR “generation time” OR “generation interval”. In view of the fact that very limited information was likely to be available on serial interval and generation time for COVID-19, all relevant publications, including pre-print papers, were considered for possible inclusion. Bibliographies within these publications were also searched for additional resources and a manual search was also carried out. Summaries, citations and extracted parameters from these publications were added to a specifically designed database. The review was confined to papers that were published in the English language.

Papers that did not contain original parameter estimates of serial interval or generation time parameters were discarded. Some of the papers contained parameter estimates derived only from original data without the fitting of statistical distributions. As these papers were considered to be less useful for model development than papers containing distribution-derived estimates, they were also omitted from further consideration. Finally, those papers that did not provide a clear methodology on how the parameter estimate were obtained were also omitted.

Parameter estimates for the serial interval and the generation time, including means, medians and 95% confidence intervals, were extracted from the remaining papers. A critical appraisal was carried out on the retained papers with a view to identifying the most relevant findings, the strengths and weaknesses of each study and particularly the potential for bias.

Based on the parameters reported in the papers, we made simulations (n=10,000 samples) from serial interval or generation time distributions, we generated simulations (n=10,000 samples) based on the reported distributions and generated box-plots with the aim of allowing easy comparison between the estimated distributions from different studies. The box-plots were generated using the “ggplot2” package in the R statistical environment.

## Results

Twenty seven scientific papers provided parameter estimates for the serial interval and/or the generation time. Seven of these papers[1-7] were removed as they only contained estimates derived from the original data or the methods for estimating the parameters were not clear. The paper by Zhang[8] was removed because that study used the same data as had previously been used by Du et al.[9] in estimating the serial interval.

Following the removal of these papers, 19 papers were further evaluated. The estimates for the serial interval and or generation time can be found in Table 1.

Most of the studies relate to Asian countries, particularly China. Some of the studies also used data from Germany, Italy and the USA. However, apart from the studies by Cereda et al.[10] and Lavezzo et al.[11] which deals solely with the COVID-19 outbreak in Italy, the number of datapoints from the non-Asian countries is very small.

Eleven of the papers had a pre-print status. The published studies consisted of research articles[12-14, 19], letters[15-16,9] and a brief communication[17].

All except two studies provided estimates for the population as a whole. The study by Liao et al.[18] provided estimates for adolescents and young adults. In the study by Zhao *et al.*[15], an

estimate was provided for males as well as for the population as a whole. Some of the studies provided more than one estimate.

A total of 22 estimates were provided for the mean of the serial interval. These ranged from 3.1 to 7.5 days. A total of 7 estimates were provided for the median of the serial interval. These ranged from 1.9 to 6.0 days.

Three estimates were provided for the mean of the generation time. These ranged from 3.9 to 5.2 days. One estimate of 5.0 days was provided for the median of the generation time.

A variety of statistical distributions were fitted to the data in order to get the parameter estimates. These included, normal, lognormal, gamma and Weibull distributions. Figure 1 shows boxplots of the samples simulated from these distributions ( $n = 24$  estimates from 18 publications). Estimates were plotted from all but the study by Liao et al.[18] included in Table 1. Pending clarification from the authors, we could not replicate the distribution described by Liao et al.[18].

**Table 1. Estimates of serial interval and generation times for COVID-19 from 19 scientific papers by country. The parameter estimates relate to the serial interval unless otherwise stated**

| Author             | Location                         | Mean (95% CI) (days) | Median (95% CI) (days) | Number of infector-infectee pairs                |
|--------------------|----------------------------------|----------------------|------------------------|--------------------------------------------------|
| <b>China</b>       |                                  |                      |                        |                                                  |
| Bi et al. [19]     | Shenzhen, China                  | 6.3 (5.2 – 7.6)      | 5.4                    | 48                                               |
| Du et al. [9]      | China (outside Hubei Province)   | 3.96 (3.53 - 4.39)   | Not provided           | 468                                              |
| Li et al. [12]     | Wuhan, China                     | 7.50 (5.30 - 19.0)   | Not provided           | 6                                                |
| Liao et al. [18]   | Chongqing University, China      | 6.5 (2.5 – 17.4)     | 1.9 (0.4 – 6.2)        | 12                                               |
| Wang & Teunis [20] | Tianjin, China                   | 4.8                  | Not provided           | 112 cases (Network analysis approach used)       |
| Zhao et al. [21]   | Hong Kong                        | 4.4 (2.9 – 6.7)      | Not provided           | 21                                               |
| Zhao et al. [21]   | Hong Kong                        | 3.1 (2.0 - 5.4)      | Not provided           | 12 infectees that matched with only one infector |
| Zhao et al. [15]   | Hong Kong and Shenzhen           | 5.2                  | Not provided           | 48 pairs                                         |
| Zhang et al. [14]  | China (excluding Hubei Province) | 5.1 (1.3 - 11.6).    | Not provided           | 35                                               |
| Du et al. [22]     | China (86 cities)                | 5.29 (4.72 - 5.86)   | Not provided           | 339                                              |
| <b>Taiwan</b>      |                                  |                      |                        |                                                  |
| Cheng et al. [23]  | Taiwan,                          | 7.0 (3.7 – 13.2)     | Not provided           | 12                                               |
| <b>Italy</b>       |                                  |                      |                        |                                                  |

|                                 |                                                                                                       |                                                                                             |                               |                                                                                                              |
|---------------------------------|-------------------------------------------------------------------------------------------------------|---------------------------------------------------------------------------------------------|-------------------------------|--------------------------------------------------------------------------------------------------------------|
| Cereda et al. [10]              | Italy                                                                                                 | 6.6 (0.7 – 19.0)                                                                            | 5.5                           | 90                                                                                                           |
| Lavezzo et al. [11]             | Italy                                                                                                 | 6.9 (2.6 - 13.4)                                                                            | Not provided                  | 120                                                                                                          |
| <b>Combination of countries</b> |                                                                                                       |                                                                                             |                               |                                                                                                              |
| Ferretti et al. [13]            | China, Taiwan, South Korea, Vietnam, Singapore<br>Germany, Italy                                      | <b>Generation time</b><br>5.0                                                               | <b>Generation time</b><br>5.0 | 40                                                                                                           |
| Ganyani et al. [24]             | Singapore                                                                                             | <b>Generation time</b><br>5.20 (3.78 – 6.78)<br><br>Serial interval<br>5.21 (-3.35 – 13.94) | Not provided                  | 91                                                                                                           |
| Ganyani et al. [24]             | Tianjin, China                                                                                        | <b>Generation time</b><br>3.95 (3.01 – 4.91)<br><br>Serial interval<br>3.95 (-4.47 – 12.51) | Not provided                  | 135                                                                                                          |
| He et al. [17]                  | China, Taiwan, Japan, Vietnam<br>Malaysia, Singapore, USA                                             | 5.8 (4.8 - 6.8)                                                                             | 5.2 (4.1 - 6.4)               | 77                                                                                                           |
| Ma et al. [25]                  | China (including Hong Kong, Macau, Taiwan), Japan, Singapore, South Korea, Malaysia, Vietnam, Germany | 6.7 (6.31 - 7.10)                                                                           | 6.0                           | 689                                                                                                          |
| Nishiura et al. [26]            | China, Taiwan, South Korea, Vietnam, Singapore<br>Germany                                             | 4.7 (3.7 – 6.6)                                                                             | 4.0 (3.1 - 4.9)               | 28                                                                                                           |
| Nishiura et al. [26]            | China, Taiwan, South Korea, Vietnam, Singapore<br>Germany                                             | 4.8 (3.8 - 6.1)                                                                             | 4.6 (3.5 - 5.9).              | Estimate based only on 18 pairs where the infector infectee relationship was considered to be most reliable. |
| Tindale et al. [27]             | Singapore,                                                                                            | 4.56 (2.69 - 6.42)                                                                          | Not provided                  | 93                                                                                                           |
|                                 | Tianjin, China                                                                                        | 4.22 (3.43 - 5.01)                                                                          | Not provided                  | 125                                                                                                          |
| Wu et al. [16]                  | China, Taiwan, Singapore, Vietnam, Malaysia, USA                                                      | 7.0 (5.8 – 8.1)                                                                             | Not provided                  | 43                                                                                                           |



## Discussion

Our scientific understanding of novel emerging pathogens is dynamic and constantly evolving as new information emerges. Early estimates of key parameters are vital in assessing the natural history of a novel emerging infectious disease such as COVID-19 and the likely impact of control measures. Pre-print papers are a valuable source of information in this regard with the proviso that the quality of these will be unclear given the lack of peer review. All the studies reviewed here were also compromised by constraints that are present at the beginning of a new disease, including the lack of specific surveillance systems, information gathering systems and precise case definitions.

### *Range of estimates obtained*

The papers reviewed provide initial parameter estimates for the serial interval and/or the generation time for COVID-19. Most of the estimates were for the serial interval rather than the generation time because in real life infection times are rarely available, so generation times cannot be estimated. Instead, typically, the onset of symptoms is observed. The estimates for the mean of the serial interval ranged from 3.1 to 7.5 days. There are a number of reasons why the estimates are wide ranging. The interval between symptoms in an infector-infectee pair will be strongly influenced by the level of social contact. This will vary widely between different countries and indeed within countries. The impact of mitigation measures is also likely to be a key factor. The implementation of control measures will reduce the opportunity for an infected individual to transmit the disease to a susceptible individual. Consequently, the serial interval is likely to decrease during the course of an epidemic. Zhao *et al.*[15] showed that the serial interval decreased by 6.2% per day (95% CI, 0.4–11.6%) from January 10 to February 2 in Hong Kong and Shenzhen. They attributed this to the strengthening of the public health control measures over time. Stratified results produced by Bi *et al.*[19] showed that if the infector was isolated less than 3 days after symptom onset, the average serial interval was 3.6 days, increasing to 8.1 days if the infector was isolated on the third day after symptom onset or later. Du *et al.*[9] pointed out that the time between successive cases contracts around the epidemic peak and that this may have influenced their estimates. On the other hand, in a study of the Po' municipality of Italy, Lavezzo *et al.*[11] estimated that the serial interval increased from 6.90 days before the implementation of comprehensive control measures to 10.12 days after the implementation of these measures. Possible reasons for this increase are not discussed in the paper.

The value of estimating the serial interval, generation time and other key parameters at the start of an epidemic was emphasized by a number of authors. As highlighted by Bi *et al.*[19], the study of an emerging pathogen at the time of its introduction provides a unique opportunity to characterize its transmission and natural history. In particular, it is possible to make assumptions about when and where cases were likely infected that are more difficult when the pathogen is widespread. Furthermore, during these early phases, uninfected and asymptomatic contacts are often closely tracked, providing critical information on transmission and natural history.

### *Methods used for estimating the serial interval and the generation time*

The estimation of the serial interval and the generation time parameters for COVID-19 presented a number of other challenges and the potential for obtaining biased estimates, as was acknowledged by a number of authors. We identified a number of specific issues in the papers that we reviewed, including the following:

- In clustered outbreaks, which is crucial to estimating the serial interval, the order of transmission (i.e., who is infector and who is infectee) can easily be mistaken. Also, given the possibility of pre-symptomatic and asymptomatic transmission particularly as the epidemic progresses, it can be difficult to determine the source of infection with certainty. In view of this, it is important that there is a well-defined methodology for determining the serial interval/generation time. Some of the studies did not describe how the order of

transmission issue was handled. In other studies, efforts were made to deal with the difficulties related to the order of transmission and the true source of infection. Nishiura et al.[26] provided separate estimates of the serial interval parameter distribution for “18 most certain pairs”. Zhao et al.[21] provided separate estimates of the serial interval parameter distribution for “infectees with only one infector”. Tindale et al.[27] used a mixture model approach for serial intervals to avoid assuming that the presumed infector is always the true infector. Ganyani et al.[24] used a Markov chain Monte Carlo (MCMC) approach for the same purpose. Ma et al.[25] made an effort to overcome this issue by setting out a clear methodology for ensuring that the order of transmission was correct.

- Generally, publicly available datasets were used in the studies. Zhao et al.[21] mention the fact that the lack of information in publicly available datasets makes it difficult to fully interpret the data. Also as mentioned by Du et al.[9], if the data are restricted to online reports of confirmed cases, they might be biased toward more severe cases in areas with a high-functioning healthcare and public health infrastructure. The rapid isolation of such case-patients might prevent longer serial intervals, potentially shifting the estimates downward compared with serial intervals that might be observed in an uncontrolled epidemic. In general, it is likely that less severe and asymptomatic cases are underrepresented in the datasets examined.
- In some of the studies, infector-infectee pairs from a variety of countries were used to estimate the serial interval. The number of pairs from some countries were very small. For example, in the paper by He et al.[17], of the 77 pairs used, one was from the USA, one was from Singapore, two were from Malaysia, two were from Vietnam, four were from Taiwan, 12 were from Japan and the rest were from various parts of China. These cannot be considered representative of the countries from which they were drawn. The same conclusion applies to the studies by Ma et al.[25], Ferretti et al.[13], Nishiura et al.[26] and Wu et al.[16]. In other studies, pairs were drawn from particular countries or regions during particular time periods. These may have been more representative of the population from which they were drawn. However, in some cases, e.g. Li et al.[12], the number of pairs selected was very small compared to the total number of cases included in the study, again calling into question the representativeness of the pairs used to estimate the serial interval or generation time.
- The case data, including the identity of each infector and the timing of symptom onset, was based on individual recollection of past events. Du et al.[9] highlight the fact that if recall accuracy is impeded by time or trauma, case-patients might be more likely to attribute infection to recent encounters (short serial intervals) over past encounters (longer serial intervals). Therefore, it is likely that recall bias is present in all of the studies and it is not possible to distinguish the level of bias present in the different studies.
- The number of pairs used to estimate the serial interval varied considerably. Only six pairs were used in the study by Li et al.[12]. In contrast, a total of 468 pairs were used in the study by Du et al.[9] and 689 pairs were studied by Ma et al.[25]. However, the value of increased sample size must be evaluated against the difficulty of ensuring accuracy of the infector infectee relationship as the sample size increases. Lavezzo et al.[11] indicate that 120 pairs were used in their study but there is a lack of clarity on how this number was obtained.
- Cheng et al.[23] state that 12 pairs were used in their estimation of the serial interval. Figure 1 of their paper indicates that these included three cases with asymptomatic infection. It is not clear how these cases were handled in estimating the series interval. Moreover, pairs in which the exposure date of the infectee was earlier than the date of symptom onset of the infector were excluded from the study.
- In the study by Zhang et al.[14] and in other studies, the serial interval was estimated from cases in household clusters. The authors make the point that estimations based on household clusters may be 20% shorter than the true value of the serial interval.
- Zhao et al.[21] highlighted the possibility of right truncated selection bias, i.e. the possibility of infector-infectee pairs with longer SI being under-represented in the sample

1  
2  
3 due to short investigation period. To minimise this possibility, the set that last date of onset  
4 symptoms for infectees as 16 days before the end of the study investigation point.  
5

6 It should be borne in mind that some of the studies may have been using the same case data in  
7 estimating the serial interval or the generation time. For example, the studies by Tindale et  
8 al.[27] and Ganyani et al.[24] were carried out in Singapore and Tianjin over the same time  
9 period. Consequently, the estimates cannot be considered to be fully independent of each other.  
10 Likewise, it is possible that there was an overlap in the case data used by Du et al.[9] and Du  
11 et al.[22] as these studies were carried out by the same group of authors.  
12

### 13 ***Statistical distributions used in estimating serial interval and generation time***

14 In most of the studies, a gamma or Weibull distribution was fitted to the data to estimate the  
15 serial interval distribution. A problem with these distributions is that negative values of the  
16 serial interval (that is, when symptoms manifest in the infectee before the infector) cannot be  
17 included. In the study by Du et al.[9], 59 of the 468 reports indicate that the infectee had  
18 symptoms earlier than the infector. Du et al.[9] and Du et al.[22] cautioned against using  
19 distributions that excluded the non-positive data and making assessments and projections based  
20 on the truncated data. In their view, the normal distribution provides the best fit for the full  
21 dataset (shifted or not) and they recommended this distribution for future epidemiologic  
22 assessments. This approach was also used by Ma et al.[25] and Tindale et al.[27]. In Ma et  
23 al.[25] study, shifted lognormal, Weibull and gamma distributions were also fitted to the data  
24 for the serial interval.  
25

### 26 ***Relationship between the serial interval, generation time and the reproduction number***

27 The generation time is used to estimate the reproduction number. Because of the difficulty in  
28 estimating the generation time, the serial interval is often used as a surrogate for the generation  
29 time. The serial interval and the generation time will have the same mean value provided that  
30 the incubation times of the infectee and infector are independent and identically distributed but  
31 their variances are expected to be different. Britton and Scalia-Tomba[28] highlighted the fact  
32 that the difference in variance between the serial and generation time can lead to biased  
33 estimates of the reproduction number. More specifically, when the serial interval distribution  
34 has a larger variance than the generation time distribution, using the serial interval as a proxy  
35 for the generation time will lead to an underestimation of the basic reproduction number.  
36 Ganyani et al.[24] provided estimates for both parameters based on data from Singapore and  
37 China and described a method for obtaining an unbiased estimate of the generation time.  
38  
39

### 40 **Conclusion**

41 Overall, the availability of parameter estimates and information on the serial interval and  
42 generation time of the COVID-19 virus is very valuable at such an early stage of the pandemic.  
43 However, the estimations are very dependent on the specific factors that applied at the time that  
44 the data was collected, including the level of social contact. Consequently, the estimates may  
45 not be entirely relevant to other environments. The serial interval estimate of 6.6 days (CI 0.7  
46 – 19.0) from the paper by Cereda et al.[10] is likely to be the most relevant to European  
47 countries. National estimates should be obtained as soon as possible. In light of the biases that  
48 could occur, the serial interval and or the generation time should be estimated from early cases  
49 and careful consideration should be given to the methodology that is used.  
50  
51

52  
53 **Funding:** All investigators are full-time employees (or retired former employees) of University  
54 College Dublin or the Irish Department of Agriculture, Food and the Marine. No additional  
55 funding was obtained for this research.  
56

57 **Competing interests:** All authors have completed the ICMJE 508 uniform disclosure form at  
58 [www.icmje.org/coi\\_disclosure.pdf](http://www.icmje.org/coi_disclosure.pdf) and declare: no support from any organisation for the  
59 submitted work; no financial relationships with any organisations that might have an interest in  
60

1  
2  
3 the submitted work in the previous three years; no other relationships or activities that could  
4 appear to have influenced the submitted work  
5

6 **Authors contributions:** Studies were selected and screened initially by AC, KH and FB using  
7 search terms outlined the methodology section, with parameters identified and recorded. This  
8 was reviewed and supplemented by a manual search by JG, again with parameters identified  
9 and recorded. JG conducted the eligibility screening of shortlisted studies, extracted the data  
10 and conducted the review with input from all authors. MC generated Figure 1. SJM, MC, ABC,  
11 AB, AWB, EAL and CGM undertook interim reviews. All authors read and approved the final  
12 manuscript.  
13

14 **Patient and public involvement statement:** It was not appropriate or possible to involve  
15 patients or the public in the design, or conduct, or reporting, or dissemination plans of our  
16 research  
17

18 **Data sharing statement:** All data relevant to the study are included in the article. All data are  
19 publicly available. Statistical code and datasets are available from the corresponding author at  
20 johnmgriffin@live.com.  
21  
22

## 23 References

- 24 1 Qianqian S, Han Z, Liqun F, et al. Study on accessing early epidemiological parameters of  
25 coronavirus disease epidemic in China. *Chinese Journal of Epidemiology* 2020;4(4):461-  
26 465.  
27
- 28 2 Pung R, Chiew C J, Young B E, et al. Investigation of three clusters of COVID-19 in  
29 Singapore: implications for surveillance and response measures. *Lancet* 2020;395:1039-  
30 46.  
31
- 32 3 Li M, Chen P, Yuan Q, et al. Transmission characteristics of the COVID-19 outbreak in  
33 China: a study driven by data. *medRxiv*  
34 2020;https://doi.org/10.1101/2020.02.26.20028431.  
35
- 36 4 Wen Y, Wei L, Li Y, et al. Epidemiological and Clinical Characteristics of Coronavirus  
37 Disease 2019 in Shenzhen, the Largest Migrant City of China. *medRxiv*  
38 2020;https://doi.org/10.1101/2020.03.22.20035246.  
39
- 40 5 You C, Deng Y, Hu W, et al. Estimation of the Time-Varying Reproduction Number of  
41 COVID-19 Outbreak in China. *medRxiv*  
42 2020;https://doi.org/10.1101/2020.02.08.20021253.  
43
- 44 6 Xia W, Liao J, Li C, et al. Transmission of corona virus disease 2019 during the incubation  
45 period may lead to a quarantine loophole.  
46 2020;https://doi.org/10.1101/2020.03.06.20031955.  
47
- 48 7 Ki M. Epidemiologic characteristics of early cases with 2019 novel coronavirus (2019-  
49 nCoV) disease in Korea. *Epidemiology and Health* 2020 Feb 9;42.  
50 https://doi.org/10.1101/2020.03.06.20031955.  
51
- 52 8 Zhang W. Estimating the presymptomatic transmission of COVID19 using incubation  
53 period and serial interval data. *medRxiv* 2020;  
54 https://doi.org/10.1101/2020.04.02.20051318.  
55
- 56 9 Du Z, Xu X, Wu Y, et al. Serial Interval of COVID-19 among publicly reported confirmed  
57 cases. *Emerg Infect Dis.* 2020 June. <https://doi.org/10.3201/eid2606.200357>.  
58  
59  
60

- 1  
2  
3  
4 10 Cereda D, Tirani M, Rovida, F, et al. The early phase of the COVID-19 outbreak in  
5 Lombardy, Italy. *arXiv* 2020;<https://arxiv.org/abs/2003.09320>.  
6  
7  
8 11 Lavezzo E, Franchin E, Ciaveralla C, et al. Suppression of COVID-19 outbreak in the  
9 municipality of Vo', Italy. *medRxiv* 2020;doi:  
10 <https://doi.org/10.1101/2020.04.17.20053157>.  
11  
12 12 Li Q, Guan X, Wu P, et al. Early Transmission Dynamics in Wuhan, China, of Novel  
13 Coronavirus–Infected Pneumonia. *New England Journal of Medicine*. 2020 Mar  
14 26;382(13):1199–1207.  
15  
16 13 Ferretti L, Wymant C, Kendall M, et al. Quantifying dynamics of SARS-CoV-2  
17 transmission suggests epidemic control with digital contact tracing. *Science* 2020 Mar  
18 31;doi:10.1126/science.abb6936.  
19  
20 14 Zhang J, Litvinova M, Wang W, et al., 2020. Evolving epidemiology and transmission  
21 dynamics of coronavirus disease 2019 outside Hubei province, China: a descriptive and  
22 modelling study. *Lancet* 2020 Apr 2;[https://doi.org/10.1016/S1473-3099\(20\)30230-9](https://doi.org/10.1016/S1473-3099(20)30230-9).  
23  
24 15 Zhao S, Cao P, Chong MKC, et al. COVID-19 and gender-specific difference: Analysis of  
25 public surveillance data in Hong Kong and Shenzhen, China, from January 10 to February  
26 15, 2020. *Infection Control & Hospital Epidemiology*. 2020; doi:10.1017/ice.2020.64.  
27  
28 16 Wu JT, Leung K, Bushman M, et al. Estimating clinical severity of COVID-19 from the  
29 transmission dynamics in Wuhan, China. *Nature Medicine* 2020;  
30 <https://doi.org/10.1038/s41591-020-0822-7/>.  
31  
32 17 He X, Lau EH, Wu P, et al. Temporal dynamics in viral shedding and transmissibility of  
33 COVID-19. *Nature Medicine* 2020;<https://doi.org/10.1038/s41591-020-0869-5>.  
34  
35 18 Liao J, Fan S, Chen J, et al. Epidemiological and clinical characteristics of COVID-19 in  
36 adolescents and young adults. *medRxiv* 2020;  
37 <https://doi.org/10.1101/2020.03.10.20032136>.  
38  
39 19 Bi Q, Wu Y, Mei S, et al. Epidemiology and transmission of COVID-19 in 391 cases and  
40 1,286 of their close contacts in Shenzhen, China: a retrospective cohort study. *The Lancet*  
41 *Infectious Diseases* 2020 April 27;[https://doi.org/10.1016/S1473-3099\(20\)30287-5](https://doi.org/10.1016/S1473-3099(20)30287-5).  
42  
43 20 Wang Y, Teunis P, Strongly heterogeneous transmission of COVID–19 in mainland China:  
44 local and regional variation. *medRxiv* 2020; <https://doi.org/10.1101/2020.03.10.20033852>.  
45  
46 21 Zhao S, Gao D, Zhuang Z, et al. Estimating the serial interval of the novel coronavirus  
47 disease (COVID-19): a statistical analysis using the public data in Hong Kong from January  
48 16 to February 15. *medRxiv* 2020; doi:<https://doi.org/10.1101/2020.02.21.20026559>.  
49  
50 22 Du Z, Xu X, Wu Y, et al. COVID-19 serial interval estimates based on confirmed cases in  
51 public reports from 86 cities. *medRxiv* 2020; doi:  
52 <https://doi.org/10.1101/2020.04.23.20075796>  
53  
54 23 Cheng HY, Jian SW, Liu DP, et al. High transmissibility of COVID-19 near symptom onset.  
55 *medRxiv* 2020;doi: <https://doi.org/10.1101/2020.03.18.20034561>.  
56  
57  
58  
59  
60



- 1  
2  
3 24 Ganyani T, Kremer C, Chen D, et al. Estimating the generation interval for COVID-19 based  
4 on symptom onset data. *medRxiv* 2020;doi: <https://doi.org/10.1101/2020.03.05.20031815>.  
5
- 6 25 Ma S, Zhang J, Zeng M, et al. Epidemiological parameters of coronavirus disease 2019: a  
7 pooled analysis of publicly reported individual data of 1155 cases from seven countries.  
8 *medRxiv* 2020;doi: <https://doi.org/10.1101/2020.03.21.20040329>.  
9
- 10 26 Nishiura H, Linton NM, Akhmetzhanov AR, Serial interval of novel coronavirus (2019-  
11 nCoV) infections. *medRxiv* 2020;doi: <https://doi.org/10.1101/2020.02.03.20019497>.  
12
- 13 27 Tindale L, Coombe M., Stockdale JE, et al. Transmission interval estimates suggest pre-  
14 symptomatic spread of COVID-19. *medRxiv* 2020;doi:  
15 <https://doi.org/10.1101/2020.03.03.20029983>.  
16
- 17 28 Britton T, Scalia-Tomba G., 2019 Estimation in emerging epidemics: biases and  
18 remedies. *J. R. Soc. Interface* 2018;16:20180670.  
19 <http://dx.doi.org/10.1098/rsif.2018.0670>.  
20  
21  
22  
23  
24  
25  
26  
27  
28  
29  
30  
31  
32  
33  
34  
35  
36  
37  
38  
39  
40  
41  
42  
43  
44  
45  
46  
47  
48  
49  
50  
51  
52  
53  
54  
55  
56  
57  
58  
59  
60

1  
2  
3  
4  
5  
6  
7  
8  
9  
10  
11  
12  
13  
14  
15  
16  
17  
18  
19  
20  
21  
22  
23  
24  
25  
26  
27  
28  
29  
30  
31  
32  
33  
34  
35  
36  
37  
38  
39  
40  
41  
42  
43  
44  
45  
46  
47  
48  
49  
50  
51  
52  
53  
54  
55  
56  
57  
58  
59  
60  
61  
62  
63  
64  
65  
66  
67  
68  
69  
70  
71  
72  
73  
74  
75  
76  
77  
78  
79  
80  
81  
82  
83  
84  
85  
86  
87  
88  
89  
90  
91  
92  
93  
94  
95  
96  
97  
98  
99  
100

[24a]  
[13]  
[24b]  
  
[12]  
[11]  
[23]  
[25]  
[16]  
[10]  
[19]  
[17]  
[22]  
[24c]  
[14]  
[27a]  
[26a]  
[20]  
[27b]  
[15]  
[26b]  
[21b]  
[24d]  
[9]  
[21a]

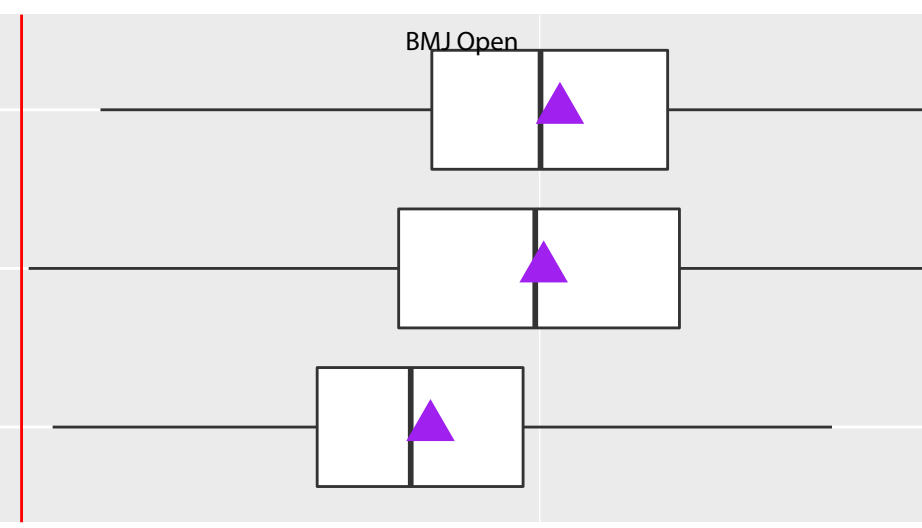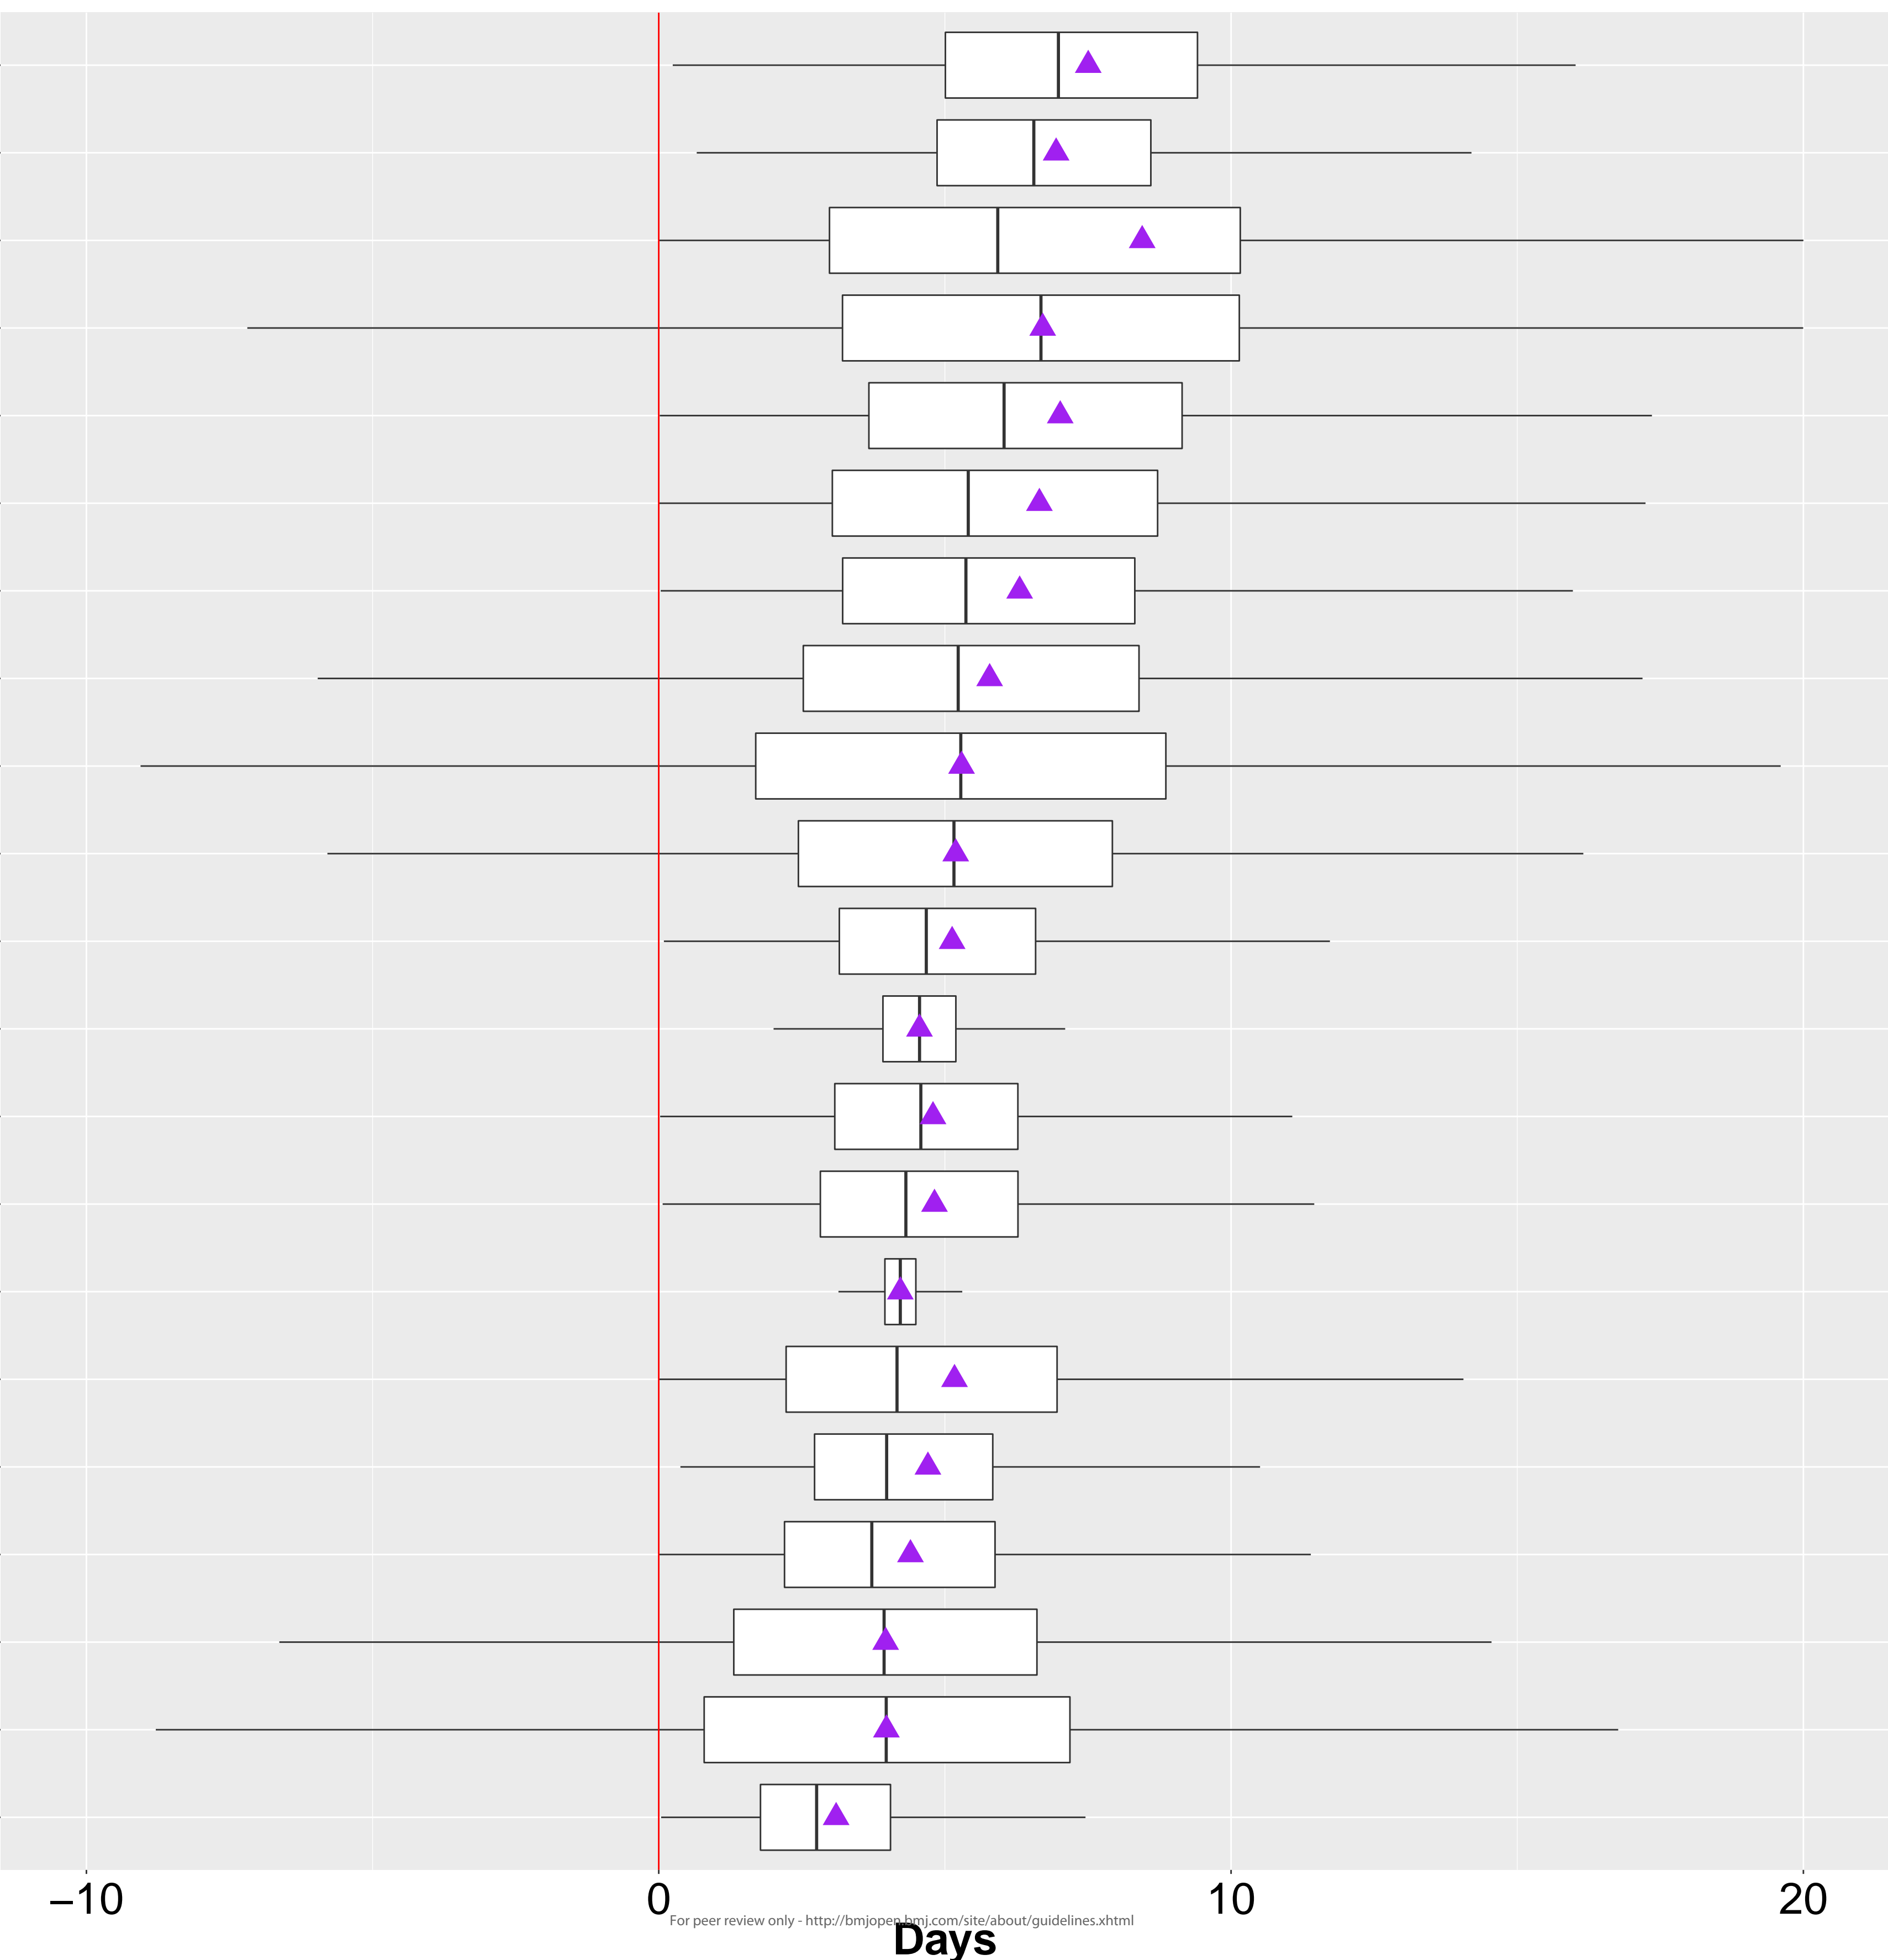

## Preferred Reporting Items for Systematic reviews and Meta-Analyses extension for Scoping Reviews (PRISMA-ScR) Checklist

| SECTION                                               | ITEM | PRISMA-ScR CHECKLIST ITEM                                                                                                                                                                                                                                                                                  | REPORTED ON PAGE # |
|-------------------------------------------------------|------|------------------------------------------------------------------------------------------------------------------------------------------------------------------------------------------------------------------------------------------------------------------------------------------------------------|--------------------|
| <b>TITLE</b>                                          |      |                                                                                                                                                                                                                                                                                                            |                    |
| Title                                                 | 1    | Identify the report as a scoping review.                                                                                                                                                                                                                                                                   |                    |
| <b>ABSTRACT</b>                                       |      |                                                                                                                                                                                                                                                                                                            |                    |
| Structured summary                                    | 2    | Provide a structured summary that includes (as applicable): background, objectives, eligibility criteria, sources of evidence, charting methods, results, and conclusions that relate to the review questions and objectives.                                                                              |                    |
| <b>INTRODUCTION</b>                                   |      |                                                                                                                                                                                                                                                                                                            |                    |
| Rationale                                             | 3    | Describe the rationale for the review in the context of what is already known. Explain why the review questions/objectives lend themselves to a scoping review approach.                                                                                                                                   |                    |
| Objectives                                            | 4    | Provide an explicit statement of the questions and objectives being addressed with reference to their key elements (e.g., population or participants, concepts, and context) or other relevant key elements used to conceptualize the review questions and/or objectives.                                  |                    |
| <b>METHODS</b>                                        |      |                                                                                                                                                                                                                                                                                                            |                    |
| Protocol and registration                             | 5    | Indicate whether a review protocol exists; state if and where it can be accessed (e.g., a Web address); and if available, provide registration information, including the registration number.                                                                                                             |                    |
| Eligibility criteria                                  | 6    | Specify characteristics of the sources of evidence used as eligibility criteria (e.g., years considered, language, and publication status), and provide a rationale.                                                                                                                                       |                    |
| Information sources*                                  | 7    | Describe all information sources in the search (e.g., databases with dates of coverage and contact with authors to identify additional sources), as well as the date the most recent search was executed.                                                                                                  |                    |
| Search                                                | 8    | Present the full electronic search strategy for at least 1 database, including any limits used, such that it could be repeated.                                                                                                                                                                            |                    |
| Selection of sources of evidence†                     | 9    | State the process for selecting sources of evidence (i.e., screening and eligibility) included in the scoping review.                                                                                                                                                                                      |                    |
| Data charting process‡                                | 10   | Describe the methods of charting data from the included sources of evidence (e.g., calibrated forms or forms that have been tested by the team before their use, and whether data charting was done independently or in duplicate) and any processes for obtaining and confirming data from investigators. |                    |
| Data items                                            | 11   | List and define all variables for which data were sought and any assumptions and simplifications made.                                                                                                                                                                                                     |                    |
| Critical appraisal of individual sources of evidence§ | 12   | If done, provide a rationale for conducting a critical appraisal of included sources of evidence; describe the methods used and how this information was used in any data synthesis (if appropriate).                                                                                                      |                    |
| Synthesis of results                                  | 13   | Describe the methods of handling and summarizing the data that were charted.                                                                                                                                                                                                                               |                    |

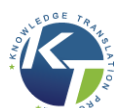



| SECTION                                       | ITEM | PRISMA-ScR CHECKLIST ITEM                                                                                                                                                                       | REPORTED ON PAGE # |
|-----------------------------------------------|------|-------------------------------------------------------------------------------------------------------------------------------------------------------------------------------------------------|--------------------|
| <b>RESULTS</b>                                |      |                                                                                                                                                                                                 |                    |
| Selection of sources of evidence              | 14   | Give numbers of sources of evidence screened, assessed for eligibility, and included in the review, with reasons for exclusions at each stage, ideally using a flow diagram.                    |                    |
| Characteristics of sources of evidence        | 15   | For each source of evidence, present characteristics for which data were charted and provide the citations.                                                                                     |                    |
| Critical appraisal within sources of evidence | 16   | If done, present data on critical appraisal of included sources of evidence (see item 12).                                                                                                      |                    |
| Results of individual sources of evidence     | 17   | For each included source of evidence, present the relevant data that were charted that relate to the review questions and objectives.                                                           |                    |
| Synthesis of results                          | 18   | Summarize and/or present the charting results as they relate to the review questions and objectives.                                                                                            |                    |
| <b>DISCUSSION</b>                             |      |                                                                                                                                                                                                 |                    |
| Summary of evidence                           | 19   | Summarize the main results (including an overview of concepts, themes, and types of evidence available), link to the review questions and objectives, and consider the relevance to key groups. |                    |
| Limitations                                   | 20   | Discuss the limitations of the scoping review process.                                                                                                                                          |                    |
| Conclusions                                   | 21   | Provide a general interpretation of the results with respect to the review questions and objectives, as well as potential implications and/or next steps.                                       |                    |
| <b>FUNDING</b>                                |      |                                                                                                                                                                                                 |                    |
| Funding                                       | 22   | Describe sources of funding for the included sources of evidence, as well as sources of funding for the scoping review. Describe the role of the funders of the scoping review.                 |                    |

JBI = Joanna Briggs Institute; PRISMA-ScR = Preferred Reporting Items for Systematic reviews and Meta-Analyses extension for Scoping Reviews.

\* Where *sources of evidence* (see second footnote) are compiled from, such as bibliographic databases, social media platforms, and Web sites.

† A more inclusive/heterogeneous term used to account for the different types of evidence or data sources (e.g., quantitative and/or qualitative research, expert opinion, and policy documents) that may be eligible in a scoping review as opposed to only studies. This is not to be confused with *information sources* (see first footnote).

‡ The frameworks by Arksey and O'Malley (6) and Levac and colleagues (7) and the JBI guidance (4, 5) refer to the process of data extraction in a scoping review as data charting.

§ The process of systematically examining research evidence to assess its validity, results, and relevance before using it to inform a decision. This term is used for items 12 and 19 instead of "risk of bias" (which is more applicable to systematic reviews of interventions) to include and acknowledge the various sources of evidence that may be used in a scoping review (e.g., quantitative and/or qualitative research, expert opinion, and policy document).

From: Tricco AC, Lillie E, Zarin W, O'Brien KK, Colquhoun H, Levac D, et al. PRISMA Extension for Scoping Reviews (PRISMA-ScR): Checklist and Explanation. *Ann Intern Med.* 2018;169:467–473. doi: [10.7326/M18-0850](https://doi.org/10.7326/M18-0850).

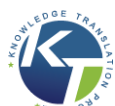

St. Michael's

Inspired Care.  
Inspiring Science.

For peer review only - <http://bmjopen.bmj.com/site/about/guidelines.xhtml>

# BMJ Open

## A rapid review of available evidence on the serial interval and generation time of COVID-19

|                                 |                                                                                                                                                                                                                                                                                                                                                                                                                                                                                                                                                                                                                                                                                                                                                                                                                                                                                                                                                                                                                                                                                                                                                                        |
|---------------------------------|------------------------------------------------------------------------------------------------------------------------------------------------------------------------------------------------------------------------------------------------------------------------------------------------------------------------------------------------------------------------------------------------------------------------------------------------------------------------------------------------------------------------------------------------------------------------------------------------------------------------------------------------------------------------------------------------------------------------------------------------------------------------------------------------------------------------------------------------------------------------------------------------------------------------------------------------------------------------------------------------------------------------------------------------------------------------------------------------------------------------------------------------------------------------|
| Journal:                        | <i>BMJ Open</i>                                                                                                                                                                                                                                                                                                                                                                                                                                                                                                                                                                                                                                                                                                                                                                                                                                                                                                                                                                                                                                                                                                                                                        |
| Manuscript ID                   | bmjopen-2020-040263.R1                                                                                                                                                                                                                                                                                                                                                                                                                                                                                                                                                                                                                                                                                                                                                                                                                                                                                                                                                                                                                                                                                                                                                 |
| Article Type:                   | Original research                                                                                                                                                                                                                                                                                                                                                                                                                                                                                                                                                                                                                                                                                                                                                                                                                                                                                                                                                                                                                                                                                                                                                      |
| Date Submitted by the Author:   | 17-Sep-2020                                                                                                                                                                                                                                                                                                                                                                                                                                                                                                                                                                                                                                                                                                                                                                                                                                                                                                                                                                                                                                                                                                                                                            |
| Complete List of Authors:       | Griffin, John; University College Dublin, Centre for Veterinary Epidemiology and Risk Analysis,<br>Casey, Miriam; University College Dublin, Centre for Veterinary Epidemiology and Risk Analysis<br>Collins, Aine; University College Dublin, Centre for Veterinary Epidemiology and Risk Analysis; Government of Ireland Department of Agriculture Food and the Marine<br>Hunt, Kevin; University College Dublin, Centre for Food Safety<br>McEvoy, David; University College Dublin, School of Public Health, Physiotherapy and Sports Science<br>Byrne, Andrew; Government of Ireland Department of Agriculture Food and the Marine, One Health Scientific Support Unit<br>McAloon, Conor; UCD School of Agriculture Food Science and Veterinary Medicine, School of Veterinary Medicine<br>Barber, Ann; University College Dublin, Centre for Veterinary Epidemiology and Risk Analysis<br>Lane, Elizabeth; University College Dublin, Centre for Veterinary Epidemiology and Risk Analysis,; Government of Ireland Department of Agriculture Food and the Marine<br>More, SImon; University College Dublin, Centre for Veterinary Epidemiology and Risk Analysis |
| <b>Primary Subject Heading</b>: | Epidemiology                                                                                                                                                                                                                                                                                                                                                                                                                                                                                                                                                                                                                                                                                                                                                                                                                                                                                                                                                                                                                                                                                                                                                           |
| Secondary Subject Heading:      | Infectious diseases, Global health                                                                                                                                                                                                                                                                                                                                                                                                                                                                                                                                                                                                                                                                                                                                                                                                                                                                                                                                                                                                                                                                                                                                     |
| Keywords:                       | COVID-19, EPIDEMIOLOGY, Public health < INFECTIOUS DISEASES, VIROLOGY                                                                                                                                                                                                                                                                                                                                                                                                                                                                                                                                                                                                                                                                                                                                                                                                                                                                                                                                                                                                                                                                                                  |
|                                 |                                                                                                                                                                                                                                                                                                                                                                                                                                                                                                                                                                                                                                                                                                                                                                                                                                                                                                                                                                                                                                                                                                                                                                        |

SCHOLARONE™  
Manuscripts



I, the Submitting Author has the right to grant and does grant on behalf of all authors of the Work (as defined in the below author licence), an exclusive licence and/or a non-exclusive licence for contributions from authors who are: i) UK Crown employees; ii) where BMJ has agreed a CC-BY licence shall apply, and/or iii) in accordance with the terms applicable for US Federal Government officers or employees acting as part of their official duties; on a worldwide, perpetual, irrevocable, royalty-free basis to BMJ Publishing Group Ltd ("BMJ") its licensees and where the relevant Journal is co-owned by BMJ to the co-owners of the Journal, to publish the Work in this journal and any other BMJ products and to exploit all rights, as set out in our [licence](#).

The Submitting Author accepts and understands that any supply made under these terms is made by BMJ to the Submitting Author unless you are acting as an employee on behalf of your employer or a postgraduate student of an affiliated institution which is paying any applicable article publishing charge ("APC") for Open Access articles. Where the Submitting Author wishes to make the Work available on an Open Access basis (and intends to pay the relevant APC), the terms of reuse of such Open Access shall be governed by a Creative Commons licence – details of these licences and which [Creative Commons](#) licence will apply to this Work are set out in our licence referred to above.

Other than as permitted in any relevant BMJ Author's Self Archiving Policies, I confirm this Work has not been accepted for publication elsewhere, is not being considered for publication elsewhere and does not duplicate material already published. I confirm all authors consent to publication of this Work and authorise the granting of this licence.

# A rapid review of available evidence on the serial interval and generation time of COVID-19

John Griffin<sup>1</sup>, Miriam Casey<sup>1</sup>, Áine B. Collins<sup>1,7</sup>, Kevin Hunt<sup>2</sup>, David Mc Evoy<sup>3</sup>, Andrew W. Byrne<sup>4</sup>, Conor G. McAloon<sup>5</sup>, Ann Barber<sup>1</sup>, Elizabeth Ann Lane<sup>1,6</sup> and Simon J. More<sup>1</sup>

<sup>1</sup>Centre for Veterinary Epidemiology and Risk Analysis, UCD School of Veterinary Medicine, University College Dublin, Belfield, Dublin D04 W6F6, Ireland.

<sup>2</sup>School of Biosystems and Food Engineering, University College Dublin, Belfield, Dublin 4, Ireland

<sup>3</sup>School of Public Health, Physiotherapy and Sports Science, University College Dublin, Belfield, Dublin 4, Ireland

<sup>4</sup>One Health Scientific Support Unit, Department of Agriculture, Food and the Marine (DAFM), Kildare Street, Dublin 2, Ireland

<sup>5</sup>Section of Herd Health and Animal Husbandry, UCD School of Veterinary Medicine, University College Dublin, Dublin D04 W6F6, Ireland.

<sup>6</sup>Department of Agriculture, Food and the Marine, Backweston Campus, Co. Kildare, W23 X3PH.

<sup>7</sup>Department of Agriculture, Food and the Marine, Kildare St., Dublin 2, Ireland

Correspondence to: John Griffin, [johnmgriffin@live.com](mailto:johnmgriffin@live.com), Centre for Veterinary Epidemiology and Risk Analysis, UCD School of Veterinary Medicine, University College Dublin, Belfield, Dublin D04 W6F6, Ireland

**Key words:** COVID-19; SARS-CoV-2; serial interval; generation time; generation interval

## Abstract:

The serial interval is the time between symptom onsets in an infector-infectee pair. The generation time, also known as the generation interval, is the time between infection events in an infector-infectee pair. The serial interval and the generation time are key parameters for assessing the dynamics of a disease. A number of scientific papers reported information pertaining to the serial interval and/or generation time for COVID-19.

**Objective:** Conduct a review of available evidence to advise on appropriate parameter values for serial interval and generation time in national COVID-19 transmission models for Ireland and on methodological issues relating to those parameters.

**Methods:** We conducted a rapid review of the literature covering the period January 1, 2020 and August 21, 2020, following pre-defined eligibility criteria. Forty scientific papers met our inclusion criteria and were included in the review.

**Results:** The mean of the serial interval ranged from 3.03 to 7.6 days, based on 38 estimates, and the median from 1.0 to 6.0 days (based on 15 estimates). Only three estimates were provided for the mean of the generation time. These ranged from 3.95 to 5.20 days. One estimate of 5.0 days was provided for the median of the generation time.

**Discussion:** Estimates of the serial interval and the generation time are very dependent on the specific factors that apply at the time that the data are collected, including the level of social contact. Consequently, the estimates may not be entirely relevant to other environments. Therefore, national estimates should be obtained as soon as possible. Careful consideration should be given to the methodology that is used. Real-time estimations of the serial interval/generation time, allowing for variations over time, may provide more accurate estimates of reproduction numbers than using conventionally fixed serial interval/generation time distributions.

### Strengths and limitations of this study

- The study provides timely information on serial interval and generation time for those involved in the development of models and in the implementation of control measures against COVID-19.
- This is a rapid review of available evidence in the scientific literature between January 1, 2020 and August 21, 2020 on the serial interval and the generation time and it contains the usual limitations associated with such a review.
- The statistical methods used in the different papers were not analysed in detail.

### Introduction

In response to the coronavirus (COVID-19) outbreak, the Irish Epidemiological Modelling Advisory Group (IEMAG) for COVID-19 was established to assist the Irish National Public Health Emergency Team (NPHET) in their decision-making during the pandemic. A subcommittee from IEMAG was tasked with researching the various parameters, leading to the development of a series of synthesis documents relevant to the parameterisation of a COVID-19 transmission model for Ireland.

The serial interval is the time between symptom onsets in an infector-infectee pair, i.e. the interval between the onset of symptoms in an infectee and its presumed infector. This can be a negative number if the onset of symptoms in the infectee occurs prior to the onset of symptoms in the infector. The generation time, also known as the generation interval, is the time between infection events in an infector-infectee pair. The serial interval and the generation time are key parameters for assessing the dynamics of an infectious disease, and the generation time, or its proxy the serial interval, is an essential quantity for estimating the reproduction number.

A number of scientific papers reported information pertaining to the serial interval and/or generation time for COVID-19. In the context of national control efforts in Ireland, our objective was to conduct a rapid review of available evidence to advise the IEMAG on appropriate parameter values for serial interval and generation time in national COVID-19 transmission models and on methodological issues relating to those parameters. This information may also be of use to developers of models and those involved in the implementation of control programmes in other countries.

### Material and methods

The guidelines in the protocol “Rapid reviews to strengthen health policy and systems: A practical guide” produced by the World Health Organization were used for carrying out this review. This can be accessed at <https://apps.who.int/iris/bitstream/handle/10665/258698/9789241512763-eng.pdf;jsessionid=E033D9A6E3118CE0701D03815D63F648?sequence=1>. The PRISMA-ScR checklist (<https://www.equator-network.org/wp-content/uploads/2018/09/PRISMA-ScR-Fillable-Checklist-1.pdf>) for scoping reviews was also used.

We conducted a review of the literature between January 1, 2020 and August 21, 2020 for all countries. Publications in the electronic databases Medline, Embase and PubMed, were searched with the following keywords: “Novel coronavirus” OR “SARS-CoV-2” OR “2019-nCoV” OR “COVID-19” AND “serial interval” OR “generation time” OR “generation interval”. Bibliographies within these publications were searched for additional papers, and a manual search was also carried out. Summaries, citations and extracted parameters from these publications were added to a specifically designed database. The review was confined to papers, including pre-proofs and accepted manuscripts, that were published in recognised journals in the English language. Data were managed during the review using Covidence (Melbourne, Australia).

Papers that did not contain original parameter estimates of serial interval or generation time parameters were discarded.

Parameter estimates for the serial interval and the generation time, including means, medians and 95% confidence intervals, were extracted from the remaining papers. A critical appraisal was carried out on the retained papers with a view to identifying the most relevant findings, the strengths and weaknesses of each study and particularly the potential for bias.

Each paper was reviewed by two authors (JG and MC) to extract the parameters required to recreate the statistical distributions described. If a statistical distribution was not fitted, or could not be recreated, the underlying serial interval data upon which the estimates reported in paper were based was extracted if available. The extracted serial interval and generation time data were summarised by box- and ridge- plots. All analyses were performed in the R statistical environment. (R version 3.6.1, <https://www.r-project.org/>). Extracted data and R code to generate the plots are available at [https://github.com/miriamcasey/covid-19\\_presymptomatic\\_project](https://github.com/miriamcasey/covid-19_presymptomatic_project).

### **Patient and public involvement statement**

It was not appropriate or possible to involve patients or the public in the design, or conduct, or reporting, or dissemination plans of our research

### **Results**

Seventy four papers were identified by the literature search. Of these, 34 papers met the eligibility criteria, and a further 6 papers were identified by searching the bibliographies of these papers or through manual searches, resulting in 40 papers being included in the review. The detailed selection process is illustrated in Figure 1.

Insert Figure 1 here

Of the shortlisted studies, most relate to Asian countries, particularly China. Apart from the study by Lavezzo et al. [1] which deals solely with the COVID-19 outbreak in Italy, the study by Prete et al. [2] from Brazil, and the study by Böhmer et al. [3] from Germany, the number of datapoints from the non-Asian countries was very small.

The published studies consisted of twenty-eight research articles [1, 3-29], four letters [2, 30-32], two reports [33, 34], a brief communication [35], three accepted manuscripts [36, 37, 38] and two pre-proofs [39, 40].

All except two studies provided estimates for people of all age groups. Liao et al. [34] provided estimates for adolescents and young adults. However these estimates, particularly the estimate of the median, do not seem to be consistent with the individual serial interval values that can be extracted from Figure 2 of the paper. The study by Huang et al. [27] provided estimates on



1  
2  
3 people aged 16-23. In the study by Zhao et al. [32], an estimate was provided for males as well  
4 as for the population as a whole. Some studies provided more than one estimate.  
5

6 Different methods were used to describe the serial interval and the generation time data. Thirty  
7 studies [1-2, 4-8, 10-11, 13-25, 30-31, 33-37, 39] assumed that the observed sample of serial  
8 interval and/or generation time came from an overall distribution in the population that could  
9 be modelled using one of a number of probability distributions. Normal, lognormal, gamma  
10 and Weibull distributions were used. Statistical distributions were not fitted to the data in the  
11 other ten studies. In six of these [3, 26-29, 38], varying degrees of summary statistics such as  
12 the mean, median, quantiles are provided. In two studies [9,40], summary statistics are provided  
13 and confidence intervals were generated using boot-strapping. Zhao et al. [32] reported a mean  
14 value for the serial interval using a regression model. In the study by Qin et al. [12] summary  
15 statistics and confidence intervals are provided but the method used for obtaining the  
16 confidence intervals are unclear.  
17

18  
19 The estimates for the serial interval and/or generation time can be found in Table 1. A total of  
20 38 estimates were provided for the mean of the serial interval. These ranged from 3.03 [2] to  
21 7.6 [9] days. A total of 15 estimates were provided for the median of the serial interval. These  
22 ranged from 1.0 [27] to 6.0 [9] days.  
23

24 Three estimates were provided for the mean of the generation time. These ranged from 3.95  
25 [23] to 5.20 [23] days. One estimate of 5.0 days [22] was provided for the median of the  
26 generation time.  
27

28 Supplementary Table 1 summarises the parameters and data that it was possible to extract from  
29 the 40 papers included in the review. For 33 estimates from 27 papers, we were able to recreate  
30 the distributions described for serial interval or generation time, draw samples (n=10000) from  
31 them, and, from the samples, generate with summary statistics consistent with what was  
32 reported in the papers. These simulated distributions are shown in the boxplot in Figure 2.  
33

34 Two further papers [34,39] provided sufficient parameters to recreate serial interval  
35 distributions but we could not replicate summary statistics reported by the authors. From these  
36 papers, we also extracted underlying serial interval data from the transmission pairs used, but  
37 we could not replicate their summary statistics.  
38

39 One further paper [16] reported fitting a gamma distribution to their serial interval data but did  
40 not provide sufficient information to simulate this distribution. We extracted underlying serial  
41 interval data from a figure in their paper for a portion of the transmission pairs used.  
42

43 A further ten papers [3,9,12,26,27,28,29,32,38,40] reported serial intervals but did not report  
44 fitting statistical distributions to them. It was possible to extract underlying serial interval data  
45 from seven of these papers [3,9,26,27,28,32,40]. We could replicate summary statistics for all  
46 except Ki [26].  
47

48 For three papers from which we were unable to extract either sufficient parameters to simulate  
49 distributions, or underlying serial interval data [12,29,38], two [29,38] supplied histograms  
50 representing their distributions in their papers.  
51

52 Supplementary Figure 1 is a ridge plot describing the 33 simulated distributions from the 27  
53 papers where this was possible, alongside the underlying data from six further papers  
54 [3,9,27,28,32,40] where we could replicate the summary statistics by summarising extracted  
55 underlying data.  
56  
57  
58  
59  
60

1  
2  
3 Supplementary Figure 2 is a ridge plot describing the 33 simulated distributions alongside all  
4 available underlying data from ten further papers, including the four [16,26,34,39] for which  
5 we could not replicate reported summary statistics.  
6  
7  
8  
9  
10  
11  
12  
13  
14  
15  
16  
17  
18  
19  
20  
21  
22  
23  
24  
25  
26  
27  
28  
29  
30  
31  
32  
33  
34  
35  
36  
37  
38  
39  
40  
41  
42  
43  
44  
45  
46  
47  
48  
49  
50  
51  
52  
53  
54  
55  
56  
57  
58  
59  
60

For peer review only



**Table 1. Estimates of serial interval and generation times for COVID-19 from 40 scientific papers, by country. All estimates relate to serial interval unless otherwise indicated**

| Country and author | Location               | Mean (95% CI) (days) | Median (95% CI) (days) | Number of infector-infectee pairs                                                                            |
|--------------------|------------------------|----------------------|------------------------|--------------------------------------------------------------------------------------------------------------|
| <b>China</b>       |                        |                      |                        |                                                                                                              |
| Li et al. [4]      | Wuhan                  | 7.50 (5.30 - 19.0)   | Not provided           | 6                                                                                                            |
| Wang et al. [5]    | Wuhan                  | 5.2 (3.8 - 6.8)      | Not provided           | 9                                                                                                            |
| Yang et al. [6]    | Hubei Province         | Not provided         | 4.6 (3.7 - 5.5)        | 131                                                                                                          |
| Du et al. [31]     | Outside Hubei Province | 3.96 (3.53 - 4.39)   | Not provided           | 468                                                                                                          |
| Ren et al. [7]     | Outside Hubei Province | 5.7 (4.7 - 6.8)      | Not provided           | 80                                                                                                           |
| Zhang et al. [8]   | Outside Hubei Province | 5.1 (1.3 - 11.6)     | Not provided           | 35                                                                                                           |
| Ali et al. [33]    | Outside Hubei Province | 5.1 (4.7 - 5.5)      | Not provided           | 677                                                                                                          |
| Xu et al. [37]     | Outside Hubei Province | 5.1 (4.7 - 5.5)      | Not provided           | 1407                                                                                                         |
| You et al. [29]    | Outside Hubei province | 4.6                  | 4.0                    | 198                                                                                                          |
| Huang et al. [27]  | Outside Wuhan          |                      | 1.0                    | 7                                                                                                            |
| Wang et al. [9]    | Beijing                | 7.6 (6.4 - 8.9)      | 6.0                    | 76                                                                                                           |
| Bi et al. [10]     | Shenzhen               | 6.3 (5.2 - 7.6)      | 5.4                    | 48                                                                                                           |
| Wang et al. [11]   | Shenzhen               | 5.9 (3.9 - 9.6)      | Not provided           | 27                                                                                                           |
| Qin et al. [12]    | Lu'an                  | 6.5 (4.8 - 8.2)      | Not provided           | 32                                                                                                           |
| Liao et al. [34]   | Chongqing University   | 6.5 (2.5 - 17.4)     | 1.9 (0.4 - 6.2)        | 12                                                                                                           |
| Wang & Teunis [13] | Tianjin                | 4.8                  | Not provided           | Not clear                                                                                                    |
| Wu et al. [14]     | Zhuhai                 | 6.3                  | 5.1 (4.3 - 6.2)        | 48                                                                                                           |
| Zhao et al. [32]   | Hong Kong and Shenzhen | 5.2                  | Not provided           | 48 pairs                                                                                                     |
| Kwok et al. [15]   | Hong Kong              | 4.77 (3.47 - 6.90)   | Not provided           | 26                                                                                                           |
| Kwok et al. [15]   | Hong Kong              | 6.23 (4.71 - 8.63)   | Not provided           | Estimate based only on 17 pairs where the infector infectee relationship was considered to be most reliable. |
| Bao et al. [16]    | Not clear              | 4.4 (3.3 - 5.4)      | Not provided           | 54                                                                                                           |
| <b>Taiwan</b>      |                        |                      |                        |                                                                                                              |
| Liu [38]           | All                    | 5.1                  | 4                      | 31                                                                                                           |
| <b>Singapore</b>   |                        |                      |                        |                                                                                                              |

|                                 |                                                                  |                                                             |                      |                                                                              |
|---------------------------------|------------------------------------------------------------------|-------------------------------------------------------------|----------------------|------------------------------------------------------------------------------|
| Pung et al. [28]                | All                                                              | Not provided                                                | Not provided         | 3 (range 3-8 days)                                                           |
| <b>South Korea</b>              |                                                                  |                                                             |                      |                                                                              |
| Chun et al. [39]                | All                                                              | Not provided                                                | 3.56 (2.72 – 4.44)   | 69                                                                           |
| Bae et al. [17]                 | All                                                              | 5.2 (SD ± 3.8)                                              | Not provided         | Not clear                                                                    |
| Mettler et al. [40]             | All                                                              | 3.43 (2.62 - 4.24)                                          | Not provided         | 102                                                                          |
| Son et al. [18]                 | Busan                                                            | 5.54 (4.08- 7.01)                                           | Not provided         | 28                                                                           |
| Ki [26]                         | South Korea                                                      | 6.6,                                                        | 4.0                  | 12                                                                           |
| <b>Vietnam</b>                  |                                                                  |                                                             |                      |                                                                              |
| Pham et al. [36]                | All                                                              | 3.24 (1.38 – 5.10)                                          | Not provided         | 33                                                                           |
| <b>Brunei</b>                   |                                                                  |                                                             |                      |                                                                              |
| Wong et al. [19]                | All                                                              | 5.4 (4.3 – 6.5)                                             | Not provided         | 59                                                                           |
| <b>Iran</b>                     |                                                                  |                                                             |                      |                                                                              |
| Aghaali et al. [20]             | Qom                                                              | 4.55                                                        | Not provided         | 37                                                                           |
| Najafi et al. [21]              | Western Iran                                                     | 5.71                                                        | Not provided         | 21                                                                           |
| <b>Brazil</b>                   |                                                                  |                                                             |                      |                                                                              |
| Prete et al. [2]                | All                                                              | 3.03 (2.26 – 3.73)                                          | 3.00                 | 65                                                                           |
| <b>Italy</b>                    |                                                                  |                                                             |                      |                                                                              |
| Lavezzo et al. [1]              | Municipality of Vo'                                              | 7.2 (5.9 – 9.6)                                             | Not provided         | Not clear                                                                    |
| <b>Germany</b>                  |                                                                  |                                                             |                      |                                                                              |
| Bohmer et al. [3]               | Germany                                                          | Not provided                                                | 4.0                  | 11                                                                           |
| <b>Combination of countries</b> |                                                                  |                                                             |                      |                                                                              |
| Ferretti et al. [22]            | China, Taiwan, South Korea, Vietnam, Singapore<br>Germany, Italy | Generation time: 5.0                                        | Generation time: 5.0 | 40                                                                           |
| Ganyani et al. [23]             | Singapore                                                        | 5.21 (-3.35 – 13.94)<br>Generation time: 5.20 (3.78 – 6.78) | Not provided         | 91                                                                           |
| Ganyani et al. [23]             | Tianjin, China                                                   | 3.95 (-4.47 – 12.51)<br>Generation time: 3.95 (3.01 – 4.91) | Not provided         | 135                                                                          |
| He et al. [35]                  | China, Taiwan, Japan, Vietnam<br>Malaysia, Singapore, USA        | 5.8 (4.8 - 6.8)                                             | 5.2 (4.1 - 6.4)      | 77                                                                           |
| Nishiura et al. [24]            | China, Taiwan, South Korea, Vietnam, Singapore<br>Germany        | 4.7 (3.7 – 6.6)                                             | 4.0 (3.1 - 4.9)      | 28                                                                           |
| Nishiura et al. [24]            | China, Taiwan, South Korea, Vietnam, Singapore<br>Germany        | 4.8 (3.8 - 6.1)                                             | 4.6 (3.5 - 5.9).     | Estimate based only on 18 pairs where the infector infectee relationship was |

|                     |                                                  |                    |              |                                 |
|---------------------|--------------------------------------------------|--------------------|--------------|---------------------------------|
|                     |                                                  |                    |              | considered to be most reliable. |
| Tindale et al. [25] | Singapore,                                       | 4.17 (2.44 - 5.89) | Not provided | 56                              |
|                     | Tianjin, China                                   | 4.31 (2.91 - 5.72) | Not provided | 72                              |
| Wu et al. [30]      | China, Taiwan, Singapore, Vietnam, Malaysia, USA | 7.0 (5.8 - 8.1)    | Not provided | 43                              |

Insert Figure 2 here

For peer review only

## Discussion

Our scientific understanding of novel emerging pathogens is dynamic and constantly evolving as new information emerges. Early estimates of key parameters are vital in assessing the natural history of a novel emerging infectious disease such as COVID-19 and the likely impact of control measures. All the studies reviewed here were compromised by constraints that are present at the beginning of a new disease, including the lack of specific surveillance systems, information gathering systems and precise case definitions.

### *Range of estimates obtained*

The papers in this review provide initial parameter estimates for serial interval and/or generation time for COVID-19. Most of the estimates were for serial interval rather than generation time because infection times are difficult to measure and are generally not available. Consequently, data on generation times are rarely available. Instead, typically, the onset of symptoms is observed. The estimates for the mean of the serial interval ranged from 3.03 [2] to 7.6 [9] days. There are a number of reasons why the estimates are wide ranging. The interval between symptoms in an infector-infectee pair will be strongly influenced by the level of social contact. This will vary widely between different countries and indeed within countries. The impact of mitigation measures is also likely to be a key factor. The implementation of control measures will reduce the opportunity for an infected individual to transmit infection to a susceptible individual. Consequently, the serial interval is likely to decrease during the course of an epidemic. Zhao et al. [32] showed that the serial interval decreased by 6.2% per day (95% CI, 0.4–11.6%) from January 10 to February 2 in Hong Kong and Shenzhen, which they attributed to the strengthening of public health control measures over time. They also showed that male infectors were associated with shorter serial intervals than female infectors.

Ali et al. [33] showed that the serial interval shortened considerably from 7.8 days to 2.6 days over a period of one month. They attributed this to enhanced non-pharmaceutical interventions, in particular case isolation. In a study of the Po' municipality of Italy, Lavezzo et al. [1] estimated that the serial interval reduced from 7.6 days before the implementation of comprehensive control measures to 6.2 days after the implementation of these measures. The mean serial interval over the entire study period was 7.2 days.

Stratified results produced by Bi et al. [10] showed that if the infector was isolated less than 3 days after symptom onset, the average serial interval was 3.6 days, increasing to 8.1 days if the infector was isolated on the third day after symptom onset or later. Du et al. [31] pointed out that the time between successive cases contracts around the epidemic peak and that this may have influenced their estimates.

The value of estimating the serial interval, generation time and other key parameters at the start of an epidemic was emphasised by a number of authors. As highlighted by Bi et al. [10], the study of an emerging pathogen at the time of its introduction provides a unique opportunity to characterise its transmission and natural history. Following initial introduction, it is possible to make robust assumptions about when and where cases were likely infected. This is often more difficult when the pathogen is widespread. Furthermore, during these early phases, uninfected and asymptomatic contacts are often closely tracked, providing critical information on transmission and natural history.

Ali et al. [33] showed that the use of real-time estimations of the serial interval, which allows for variations over time, provides more accurate estimates of reproduction numbers than using conventionally fixed serial interval distributions.

### *Methods used for estimating the serial interval and the generation time*

1  
2  
3 The estimation of the serial interval and the generation time parameters for COVID-19  
4 presented a number of other challenges and the potential for obtaining biased estimates, as was  
5 acknowledged by a number of authors. We identified a number of specific issues in the papers  
6 that we reviewed, including the following:

- 7 • In clustered outbreaks, which is crucial to estimating the serial interval, the order of  
8 transmission (i.e., who is infector and who is infectee) can easily be mistaken. Also, given  
9 the possibility of pre-symptomatic and asymptomatic transmission, particularly as the  
10 epidemic progresses, it can be difficult to determine the source of infection with certainty.  
11 In view of this, it is important that there is a well-defined methodology for estimating the  
12 serial interval/generation time. Some of the studies did not describe how the order of  
13 transmission issue was handled. In other studies, efforts were made to deal with the  
14 difficulties related to the order of transmission and the true source of infection. Nishiura et  
15 al. [24] provided separate estimates of the serial interval parameter distribution for “18 most  
16 certain pairs”. A similar approach was taken by Kwok et al. [15]. Tindale et al. [25] used a  
17 mixture model approach for serial intervals to avoid assuming that the presumed infector  
18 is always the true infector. Ganyani et al. [23] used a Markov chain Monte Carlo (MCMC)  
19 approach for the same purpose. Wang et al. [11] allowed for the possibility of multiple  
20 infectors of a single infectee by using an interval censored likelihood function.
- 21 • Generally, publicly available datasets were used in the studies under review. Du et al. [31]  
22 mention the fact that if the data are restricted to online reports of confirmed cases, they  
23 might be biased toward more severe cases in areas with a high-functioning healthcare and  
24 public health infrastructure. The rapid isolation of such case-patients might prevent longer  
25 serial intervals, potentially shifting the estimates downward compared with serial intervals  
26 that might be observed in an uncontrolled epidemic. In general, it is likely that less severe  
27 cases are underrepresented in the datasets examined.
- 28 • In some of the studies, infector-infectee pairs from a variety of countries were used to  
29 estimate the serial interval. The number of pairs from some countries were very small. For  
30 example, in the paper by He et al. [35], of the 77 pairs used, one was from the USA, one  
31 was from Singapore, two were from Malaysia, two were from Vietnam, four were from  
32 Taiwan, 12 were from Japan and the rest were from various parts of China. These cannot  
33 be considered representative of the countries from which they were drawn. The same  
34 conclusion applies to the studies by Ferretti et al. [22], Nishiura et al. [24] and Wu et al.  
35 [30]. In other studies, pairs were drawn from particular countries or regions during  
36 particular time periods. These may have been more representative of the population from  
37 which they were drawn. However, in some cases, e.g. Li et al. [4], the number of pairs  
38 selected was very small compared to the total number of cases included in the study, again  
39 calling into question the representativeness of the pairs used to estimate the serial interval  
40 or generation time.
- 41 • The case data, including the identity of each infector and the timing of symptom onset,  
42 were based on individual recollection of past events. Du et al. [31] note that recall accuracy  
43 is impeded by time or trauma, and case-patients might be more likely to attribute infection  
44 to recent encounters (short serial intervals) over past encounters (longer serial intervals).  
45 Therefore, it is likely that recall bias is present in all studies. It is not possible to distinguish  
46 the level of bias present in the different studies.
- 47 • Tindale et al. [25] highlight the fact that different criteria for determining what qualifies as  
48 illness onset could result in differences in estimates of the serial interval in different  
49 reporting jurisdictions.
- 50 • The number of pairs used to estimate the serial interval varied considerably. Only three and  
51 six pairs were used in the study by Pung et al. [28] and Li et al.,[4] respectively.]. In  
52 contrast, a total of 677 pairs were used in the study by Ali et al. [33] and 1407 pairs were  
53 studied by Xu et al. [37]. However, the value of increased sample size must be evaluated  
54 against the difficulty of ensuring accuracy of the infector-infectee relationship as the  
55 sample size increases. There is a lack of clarity on the precise number of infector-infectee  
56 pairs that were used to estimate the serial interval in the study by Lavezzo et al. [1].  
57  
58  
59  
60

1  
2  
3 However, there was a total number of 81 individuals who tested positive in the study and  
4 the infector-infectee pairs were drawn from this population.

- 5 • In the study by Zhang et al. [8] and in other studies, the serial interval was estimated from  
6 cases in household clusters. The authors make the point that estimations based on  
7 household clusters may be 20% shorter than the true value of the serial interval.
- 8 • A number of authors, including Mettler et al. [40], Kwok et al. [15] and Aghaali et al. [20]  
9 highlighted the possibility of right truncated selection bias, i.e. the possibility of infector-  
10 infectee pairs with longer serial intervals being under-represented in the sample due to short  
11 investigation period. Measures were taken in a number of studies to minimise this  
12 possibility.
- 13 • Some aspects of the methodology used by Ganyani et al. [23] were subsequently questioned  
14 by Bacallado et al. [41]. These related to the independence of the serial interval values used  
15 in the study, the independence of the generation time and the incubation period and the  
16 particular Metropolitan-Hastings sampler that was used in the study. Kremer et al. [42]  
17 accepted that simplifying assumptions had been made in the Ganyani et al. study but stated  
18 that the study had certain advantages. Kremer et al. also accepted that the Metropolitan-  
19 Hastings sampler that they used should be amended in light of the comments made by  
20 Bacallado et al. but they stated that the overall conclusions in their article would not change  
21 as a result of this modification.

22  
23  
24 It should be borne in mind that some of the studies may have used the same case data in  
25 estimating the serial interval or the generation time. Consequently, the estimates may not be  
26 fully independent of each other. For example, the studies by Tindale et al. [25] and Ganyani et  
27 al. [23] were carried out in Singapore and Tianjin over the same time period. Similarly, the  
28 same set of data seems to have been used in the studies by Xu et al. [37] and Ali et al. [33]. It  
29 is not clear why 1407 transmission pairs were available in the former study compared to 677  
30 pairs in the latter study.

31  
32  
33 Mettler et al. [40] proposed that the diagnostic serial interval (the time between the diagnosis  
34 dates of the infector and infectee) be used as a new indicator for the effectiveness of a country's  
35 contact tracing as part of the epidemic surveillance.

### 36 37 ***Statistical distributions used in estimating serial interval and generation time***

38 In most of the studies, a gamma, lognormal or Weibull distribution was fitted to the data to  
39 estimate the serial interval distribution. A problem with these distributions is that negative  
40 values of the serial interval (that is, when symptoms manifest in the infectee before the infector)  
41 cannot be included. In the study by Du et al. [31], 59 of the 468 reports indicate that the infectee  
42 had symptoms earlier than the infector. Du et al. cautioned against using distributions that  
43 excluded the non-positive data and making assessments and projections based on the truncated  
44 data. In their view, the normal distribution provides the best fit for the full dataset (shifted or  
45 not) and they recommended this distribution for future epidemiologic assessments. This  
46 approach was also used by other authors, including Ali et al. [33] and Xu et al. [37]. Prete et al.  
47 [2] used a modelling approach and also fitted a normal distribution to the data.

### 48 49 ***Relationship between the serial interval, generation time and the reproduction number***

50 The generation time is used to estimate the reproduction number. Because of the difficulty in  
51 estimating the generation time, the serial interval is often used as a surrogate for the generation  
52 time. The serial interval and the generation time will have the same mean value if the incubation  
53 times of the infectee and infector are independent and identically distributed, however, their  
54 variances are expected to be different. Britton and Scalia-Tomba [43] note that the difference  
55 in variance between the serial and generation time can lead to biased estimates of the  
56 reproduction number. More specifically, when the serial interval distribution has a larger  
57 variance than the generation time distribution, using the serial interval as a proxy for the  
58 generation time will lead to an underestimation of the basic reproduction number. Ganyani et  
59  
60



1  
2  
3 al. [23] provided estimates for both parameters based on data from Singapore and China and  
4 described a method for obtaining an unbiased estimate of the generation time.  
5

### 6 **Conclusion**

7  
8 The availability of parameter estimates and information on the serial interval and generation  
9 time of the COVID-19 virus are vital for measuring the dynamics of the disease and for  
10 estimating the reproduction number. These estimates are very dependent on the specific factors  
11 that apply at the time that the data are collected, including the level of social contact.  
12 Consequently, the estimates may not be entirely relevant to other environments. Therefore,  
13 national estimates should be obtained as soon as possible. Careful consideration should be given  
14 to the methodology that is used. Real-time estimations of the serial interval/generation time,  
15 allowing for variations over time, may provide more accurate estimates of reproduction  
16 numbers than using conventionally fixed serial interval/generation time distributions  
17

18  
19 **Funding:** All investigators are full-time employees (or retired former employees) of University  
20 College Dublin or the Irish Department of Agriculture, Food and the Marine. No additional  
21 funding was obtained for this research.  
22

23  
24 **Competing interests:** All authors have completed the ICMJE 508 uniform disclosure form at  
25 [www.icmje.org/coi\\_disclosure.pdf](http://www.icmje.org/coi_disclosure.pdf) and declare: no support from any organisation for the  
26 submitted work; no financial relationships with any organisations that might have an interest in  
27 the submitted work in the previous three years; no other relationships or activities that could  
28 appear to have influenced the submitted work

29  
30 **Data availability statement:** All data relevant to the study are included in the article. The data  
31 were taken from previously published studies.

32  
33 **Authors contributions:** Studies were selected and screened initially by ABC and KH using  
34 search terms outlined in the methodology section, with parameters identified and recorded. This  
35 was reviewed and supplemented by a manual search by JG, again with parameters identified  
36 and recorded. JG conducted the eligibility screening of shortlisted studies, extracted the data  
37 and conducted the review with input from all authors. MC generated Figure 2 and read the full  
38 text of the papers. SJM, MC, ABC, AB, AWB, EAL, DM and CGM undertook interim reviews.  
39 All authors read and approved the final manuscript.

40  
41 **Acknowledgments:** We would like to express our appreciation to Francis Butler and Patrick  
42 Wall for their contribution as part of the COVID-19 epidemiological team.  
43  
44  
45  
46  
47  
48  
49  
50  
51  
52  
53  
54  
55  
56  
57  
58  
59  
60

## References

- 1 Lavezzo E, Franchin E, Ciaveralla C, et al. Suppression of COVID-19 outbreak in the municipality of Vo'. *Nature* 2020; <https://doi.org/10.1038/s41586-020-2488-1>
- 2 Prete CA, Buss L, Dighe A, et al. Serial interval distribution of SARS-CoV-2 infection in Brazil. *J. Travel. Med.* 2020; 1-3. <https://doi.org/10.1093/jtm/taaa115>
- 3 Böhmer MM, Buchholz U, Corman VM, et al. Investigation of a COVID-19 outbreak in Germany resulting from a single travel-associated primary case: a case series. *Lancet Infect Dis.* 2020;20(8):920-928. [https://doi.org/10.1016/S1473-3099\(20\)30314-5](https://doi.org/10.1016/S1473-3099(20)30314-5)
- 4 Li Q, Guan X, Wu P, et al. Early Transmission Dynamics in Wuhan, China, of Novel Coronavirus-Infected Pneumonia. *New England Journal of Medicine* 2020 Mar 26;382(13):1199–1207.
- 5 Wang X, Zhou Q, He Y, et al. Nosocomial outbreak of COVID-19 pneumonia in Wuhan, China. *Eur. Respir. J.* 2020; 55: 2000544. <https://doi.org/10.1183/13993003.00544-2020>.
- 6 Yang L, Dai J, Zhao J, et al. Estimation of incubation period and serial interval of COVID-19: analysis of 178 cases and 131 transmission chains in Hubei province, China. *Epidemiology and Infection* 2020;148, e117, 1–6.
- 7 Ren X, Li Y, Yang X, et al. Evidence for pre-symptomatic transmission of coronavirus disease 2019 (COVID-19) in China. *Influenza Other Respi Viruses.* 2020;00:1–8. <https://doi.org/10.1111/irv.12787>
- 8 Zhang J, Litvinova M, Wang W, et al., 2020. Evolving epidemiology and transmission dynamics of coronavirus disease 2019 outside Hubei province, China: a descriptive and modelling study. *Lancet* 2020 Apr 2; [https://doi.org/10.1016/S1473-3099\(20\)30230-9](https://doi.org/10.1016/S1473-3099(20)30230-9).
- 9 Wang, X., Pan, Y., Zhang, D. et al. Basic epidemiological parameter values from data of real-world in mega-cities: the characteristics of COVID-19 in Beijing, China. *BMC Infect Dis* 2020;20, 526. <https://doi.org/10.1186/s12879-020-05251-9>
- 10 Bi Q, Wu Y, Mei S, et al. Epidemiology and transmission of COVID-19 in 391 cases and 1,286 of their close contacts in Shenzhen, China: a retrospective cohort study. *The Lancet Infectious Diseases* 2020 April 27; [https://doi.org/10.1016/S1473-3099\(20\)30287-5](https://doi.org/10.1016/S1473-3099(20)30287-5). April 27 ;2020. [https://doi.org/10.1016/S1473-3099\(20\)30287-5](https://doi.org/10.1016/S1473-3099(20)30287-5).
- 11 Wang K, Zhao S, Liao Y, et al. Estimating the serial interval of the novel coronavirus disease (COVID-19) based on the public surveillance data in Shenzhen, China, from 19 January to 22 February 2020. *Transbound Emerg Dis.* 2020;00:1–5. <https://doi.org/10.1111/tbed.13647>
- 12 Qin W, Sun J, Xu P, et al. The descriptive epidemiology of coronavirus disease 2019 during the epidemic period in Lu'an, China: achieving limited community transmission using proactive response strategies. *Epidemiology and Infection* 2020;148, e132, 1–5. <https://doi.org/10.1017/S0950268820001478>
- 13 Wang Y, Teunis P, Strongly heterogeneous transmission of COVID-19 in mainland China: *Front Med (Lausanne)* 2020;7:329.



- 1  
2  
3 14 Wu J, Huang Y, Tu C, et al. Household Transmission of SARS-CoV-2, Zhuhai, China, 2020. *Clin Infect Dis*. 2020;ciaa557. <https://doi.org/10.1093/cid/ciaa557>
- 4  
5  
6  
7 15 Kwok KO, Wong VWY, Wei WI, et al. Epidemiological characteristics of the first 53  
8 laboratory-confirmed cases of COVID-19 epidemic in Hong Kong, 13 February  
9 2020. *Euro Surveill*. 2020;25(16):2000155. <https://doi.org/10.2807/1560-7917.ES.2020.25.16.2000155>
- 10  
11  
12 16 Bao C, Pan E, Ai J, et al. COVID-19 outbreak following a single patient exposure at an  
13 entertainment site: An epidemiological study. *Transbound Emerg Dis*. 2020;  
14 <https://doi.org/10.1111/tbed.13742>. PMID: 32725765.
- 15  
16 17 Bae S, Kim H, Jung TY, et al. Epidemiological Characteristics of COVID-19 Outbreak  
18 at Fitness Centers in Cheonan, Korea. *J Korean Med Sci*. 2020;35(31):e288. Published  
19 2020 Aug 10. <https://doi.org/10.3346/jkms.2020.35.e288>
- 20  
21 18 Son H, Lee H, Lee M, et al. Epidemiological characteristics of and containment  
22 measures for COVID-19 in Busan, Korea. *Epidemiol Health* 2020; Volume: 42, Article  
23 ID: e2020035 <https://doi.org/10.4178/epih.e2020035>
- 24  
25 19 Wong J, Chaw L, Koh WC, et al. Epidemiological Investigation of the First 135  
26 COVID-19 Cases in Brunei: Implications for Surveillance, Control, and Travel  
27 Restrictions. *Am J Trop Med Hyg*. 2020;10.4269/ajtmh.20-0771.  
28 <https://doi.org/10.4269/ajtmh.20-0771>
- 29  
30 20 Aghaali M, Kolifarhood G, Nikbakht R, et al. Estimation of the serial interval and basic  
31 reproduction number of COVID-19 in Qom, Iran, and three other countries: A data-  
32 driven analysis in the early phase of the outbreak. *Transbound Emerg Dis*. 2020;00:1–  
33 9. <https://doi.org/10.1111/tbed.13656>
- 34  
35 21 Najafi F, Izadi N, Hashemi-Nazari SS, et al. Serial interval and time-varying  
36 reproduction number estimation for COVID-19 in western Iran. *New Microbes New*  
37 *Infect*. 2020;36:100715. <https://doi.org/10.1016/j.nmni.2020.100715>
- 38  
39 22 Ferretti L, Wymant C, Kendall M, et al. Quantifying dynamics of SARS-CoV-2  
40 transmission suggests epidemic control with digital contact tracing. *Science* 2020 Mar  
41 31. <https://doi.org/10.1126/science.abb6936>.
- 42  
43 23 Ganyani T, Kremer C, Chen D, et al. Estimating the generation interval for coronavirus  
44 (COVID-19) based on symptom onset data. *Euro surveill*. 2020;25(17):pii=2000257.  
45 <https://doi.org/10.2807/1560-7917.ES.2020.25.17.2000257>
- 46  
47 24 Nishiura H, Linton NM, Akhmetzhanov AR, Serial interval of novel coronavirus  
48 (COVID-19) infections. *Int. J. Infect. Dis*. 2020;93:284-286
- 49  
50 25 Tindale LC, Stockdale JE, Coombe M, et al. Evidence for transmission of COVID-19  
51 prior to symptom onset. *Elife*. 2020;9:e57149. <https://doi.org/10.7554/eLife.57149>
- 52  
53 26 Ki M; Task Force for 2019-nCoV. Epidemiologic characteristics of early cases with  
54 2019 novel coronavirus (2019-nCoV) disease in Korea. *Epidemiol Health*.  
55 2020;42:e2020007. doi:10.4178/epih.e2020007
- 56  
57 27 Huang L, Zhang X, Zhang X, et al. Rapid asymptomatic transmission of COVID-19  
58 during the incubation period demonstrating strong infectivity in a cluster of youngsters  
59  
60

- aged 16-23 years outside Wuhan and characteristics of young patients with COVID-19: A prospective contact-tracing study. *J Infect.* 2020;80(6):e1-e13. <https://doi.org/10.1016/j.jinf.2020.03.006>
- 28 Pung R, Chiew C J, Young B E, et al. Investigation of three clusters of COVID-19 in Singapore: implications for surveillance and response measures. *Lancet* 2020;395:1039–46.
- 29 You C, Deng Y, Hu W, et al. Estimation of the time-varying reproduction number of COVID-19 outbreak in China. *Int J Hyg Environ Health.* 2020;228:113555. doi:10.1016/j.ijheh.2020.113555
- 30 Wu JT, Leung K, Bushman M, et al. Estimating clinical severity of COVID-19 from the transmission dynamics in Wuhan, China. *Nature Medicine* 2020; <https://doi.org/10.1038/s41591-020-0822-7/>.
- 31 Du Z, Xu X, Wu Y, et al. Serial Interval of COVID-19 among publicly reported confirmed cases. *Emerg Infect Dis.* 2020 June. <https://doi.org/10.3201/eid2606.200357>.
- 32 Zhao S, Cao P, Chong MKC, et al. COVID-19 and gender-specific difference: Analysis of public surveillance data in Hong Kong and Shenzhen, China, from January 10 to February 15, 2020. *Infection Control & Hospital Epidemiology.* 2020; <https://doi.org/10.1017/ice.2020.64>.
- 33 Ali ST, Wang L, Lau EHY, et al. Serial interval of SARS-CoV-2 was shortened over time by nonpharmaceutical interventions. *Science* 2020. <https://doi.org/10.1126/science.abc9004>
- 34 Liao J, Fan S, Chen J, et al. Epidemiological and clinical characteristics of COVID-19 in adolescents and young adults. *The Innovation* 2020. <https://doi.org/10.1016/j.xinn.2020.04.001>
- 35 He X, Lau EH, Wu P, et al. Temporal dynamics in viral shedding and transmissibility of COVID-19. *Nature Medicine* 2020. <https://doi.org/10.1038/s41591-020-0869-5>.
- 36 Pham QT, Rabaa MA, Duong HL, et al. The first 100 days of SARS-CoV-2 control in Vietnam [published online ahead of print, 2020 Aug 1]. *Clin Infect Dis.* 2020;ciaa1130. <https://doi.org/10.1093/cid/ciaa1130>
- 37 Xu XK, Liu XF, Wu Y, et al. Reconstruction of Transmission Pairs for novel Coronavirus Disease 2019 (COVID-19) in mainland China: Estimation of Super-spreading Events, Serial Interval, and Hazard of Infection [published online ahead of print, 2020 Jun 18]. *Clin Infect Dis.* 2020;ciaa790. <https://doi.org/10.1093/cid/ciaa790>
- 38 Liu JY, Chen TJ, Hwang SJ et al. Analysis of community-acquired COVID-19 cases in Taiwan, *Journal of the Chinese Medical Association:* 2020; Volume Latest Articles - Issue - doi: 10.1097/JCMA.0000000000000411
- 39 Chun JY, Baek G, Kim Y. Transmission onset distribution of COVID-19. *International Journal of Infectious Diseases* 2020; <https://doi.org/10.1016/j.ijid.2020.07.075>
- 40 Mettler SK, Kim J, Maathuis MH. Diagnostic serial interval as a novel indicator for contact tracing effectiveness exemplified with the SARS-CoV-2/COVID-19 outbreak in South Korea. *International Journal of Infectious Diseases* 2020; <https://doi.org/10.1016/j.ijid.2020.07.068>

- 1  
2  
3  
4 41 Bacallado Sergio , Zhao Qingyuan , Ju Nianqiao. Letter to the editor: Generation  
5 interval for COVID-19 based on symptom onset data. *Euro Surveill.*  
6 2020;25(29):pii=2001381. <https://doi.org/10.2807/1560-7917.ES.2020.25.29.2001381>  
7  
8 42 Kremer C, Ganyani T, Chen D, et al. Reply to Letter: Estimating the generation interval  
9 for COVID-19 based on symptom onset data. *Euro Surveill.* 2020;25(29):pii=2001269.  
10 <https://doi.org/10.2807/1560-7917.ES.2020.25.29.2001269>  
11  
12 43 Britton T, Scalia-Tomba G., 2019 Estimation in emerging epidemics: biases and  
13 remedies. *J. R. Soc. Interface* 2018;16:20180670.  
14 <http://dx.doi.org/10.1098/rsif.2018.0670>.  
15  
16  
17  
18  
19  
20  
21  
22  
23  
24  
25  
26  
27  
28  
29  
30  
31  
32  
33  
34  
35  
36  
37  
38  
39  
40  
41  
42  
43  
44  
45  
46  
47  
48  
49  
50  
51  
52  
53  
54  
55  
56  
57  
58  
59  
60

For peer review only

1  
2  
3 **Figure 1. PRISMA-ScR flow diagram**  
4

5 **Figure 2: A boxplot summarising 33 estimates for serial interval or generation time from**  
6 **27 papers. The purple triangles represent the means of the distributions. GT =**  
7 **Generation time. SI=Serial interval.**  
8

9  
10 **Supplementary Figure 1: A ridge plot summarising 33 estimates for serial interval or**  
11 **generation time from 27 papers from which it was possible to simulate distributions (white**  
12 **fill) and six further papers from which the underlying serial interval data could be**  
13 **extracted and summary statistics replicated (grey fill). GT = Generation time. SI=Serial**  
14 **interval.**  
15

16 **Supplementary Figure 2: A ridge plot summarising 33 estimates for serial interval or**  
17 **generation time from 27 papers from which it was possible to simulate distributions (white**  
18 **fill) and ten further papers from which the underlying serial could be extracted (grey fill).**  
19 **Summary statistics could not be replicated for four of these papers. GT = Generation**  
20 **time. SI=Serial interval.**  
21  
22  
23  
24  
25  
26  
27  
28  
29  
30  
31  
32  
33  
34  
35  
36  
37  
38  
39  
40  
41  
42  
43  
44  
45  
46  
47  
48  
49  
50  
51  
52  
53  
54  
55  
56  
57  
58  
59  
60

|                |                                                                                                                                                                                                             |
|----------------|-------------------------------------------------------------------------------------------------------------------------------------------------------------------------------------------------------------|
| Identification | Records identified through database searching: Medline (n = 34), Embase (n = 60), Pubmed (n = 72). 74 records remaining after duplicates removed.                                                           |
| Screening      | 74 records titles and abstracts screened.<br><br>16 removed because they did not contain parameter estimates<br>5 removed because they were pre-printed papers rather than published papers.                |
| Eligibility    | 53 full-text studies assessed for eligibility.<br><br>2 papers were excluded because they did not contain parameter estimates<br>17 papers were excluded because the parameter estimates were not original. |
| Included       | 34 papers eligible based on screen process.<br>6 paper identified from bibliographies or from manual searches.<br><br>Total number of papers included in the review = 40.                                   |

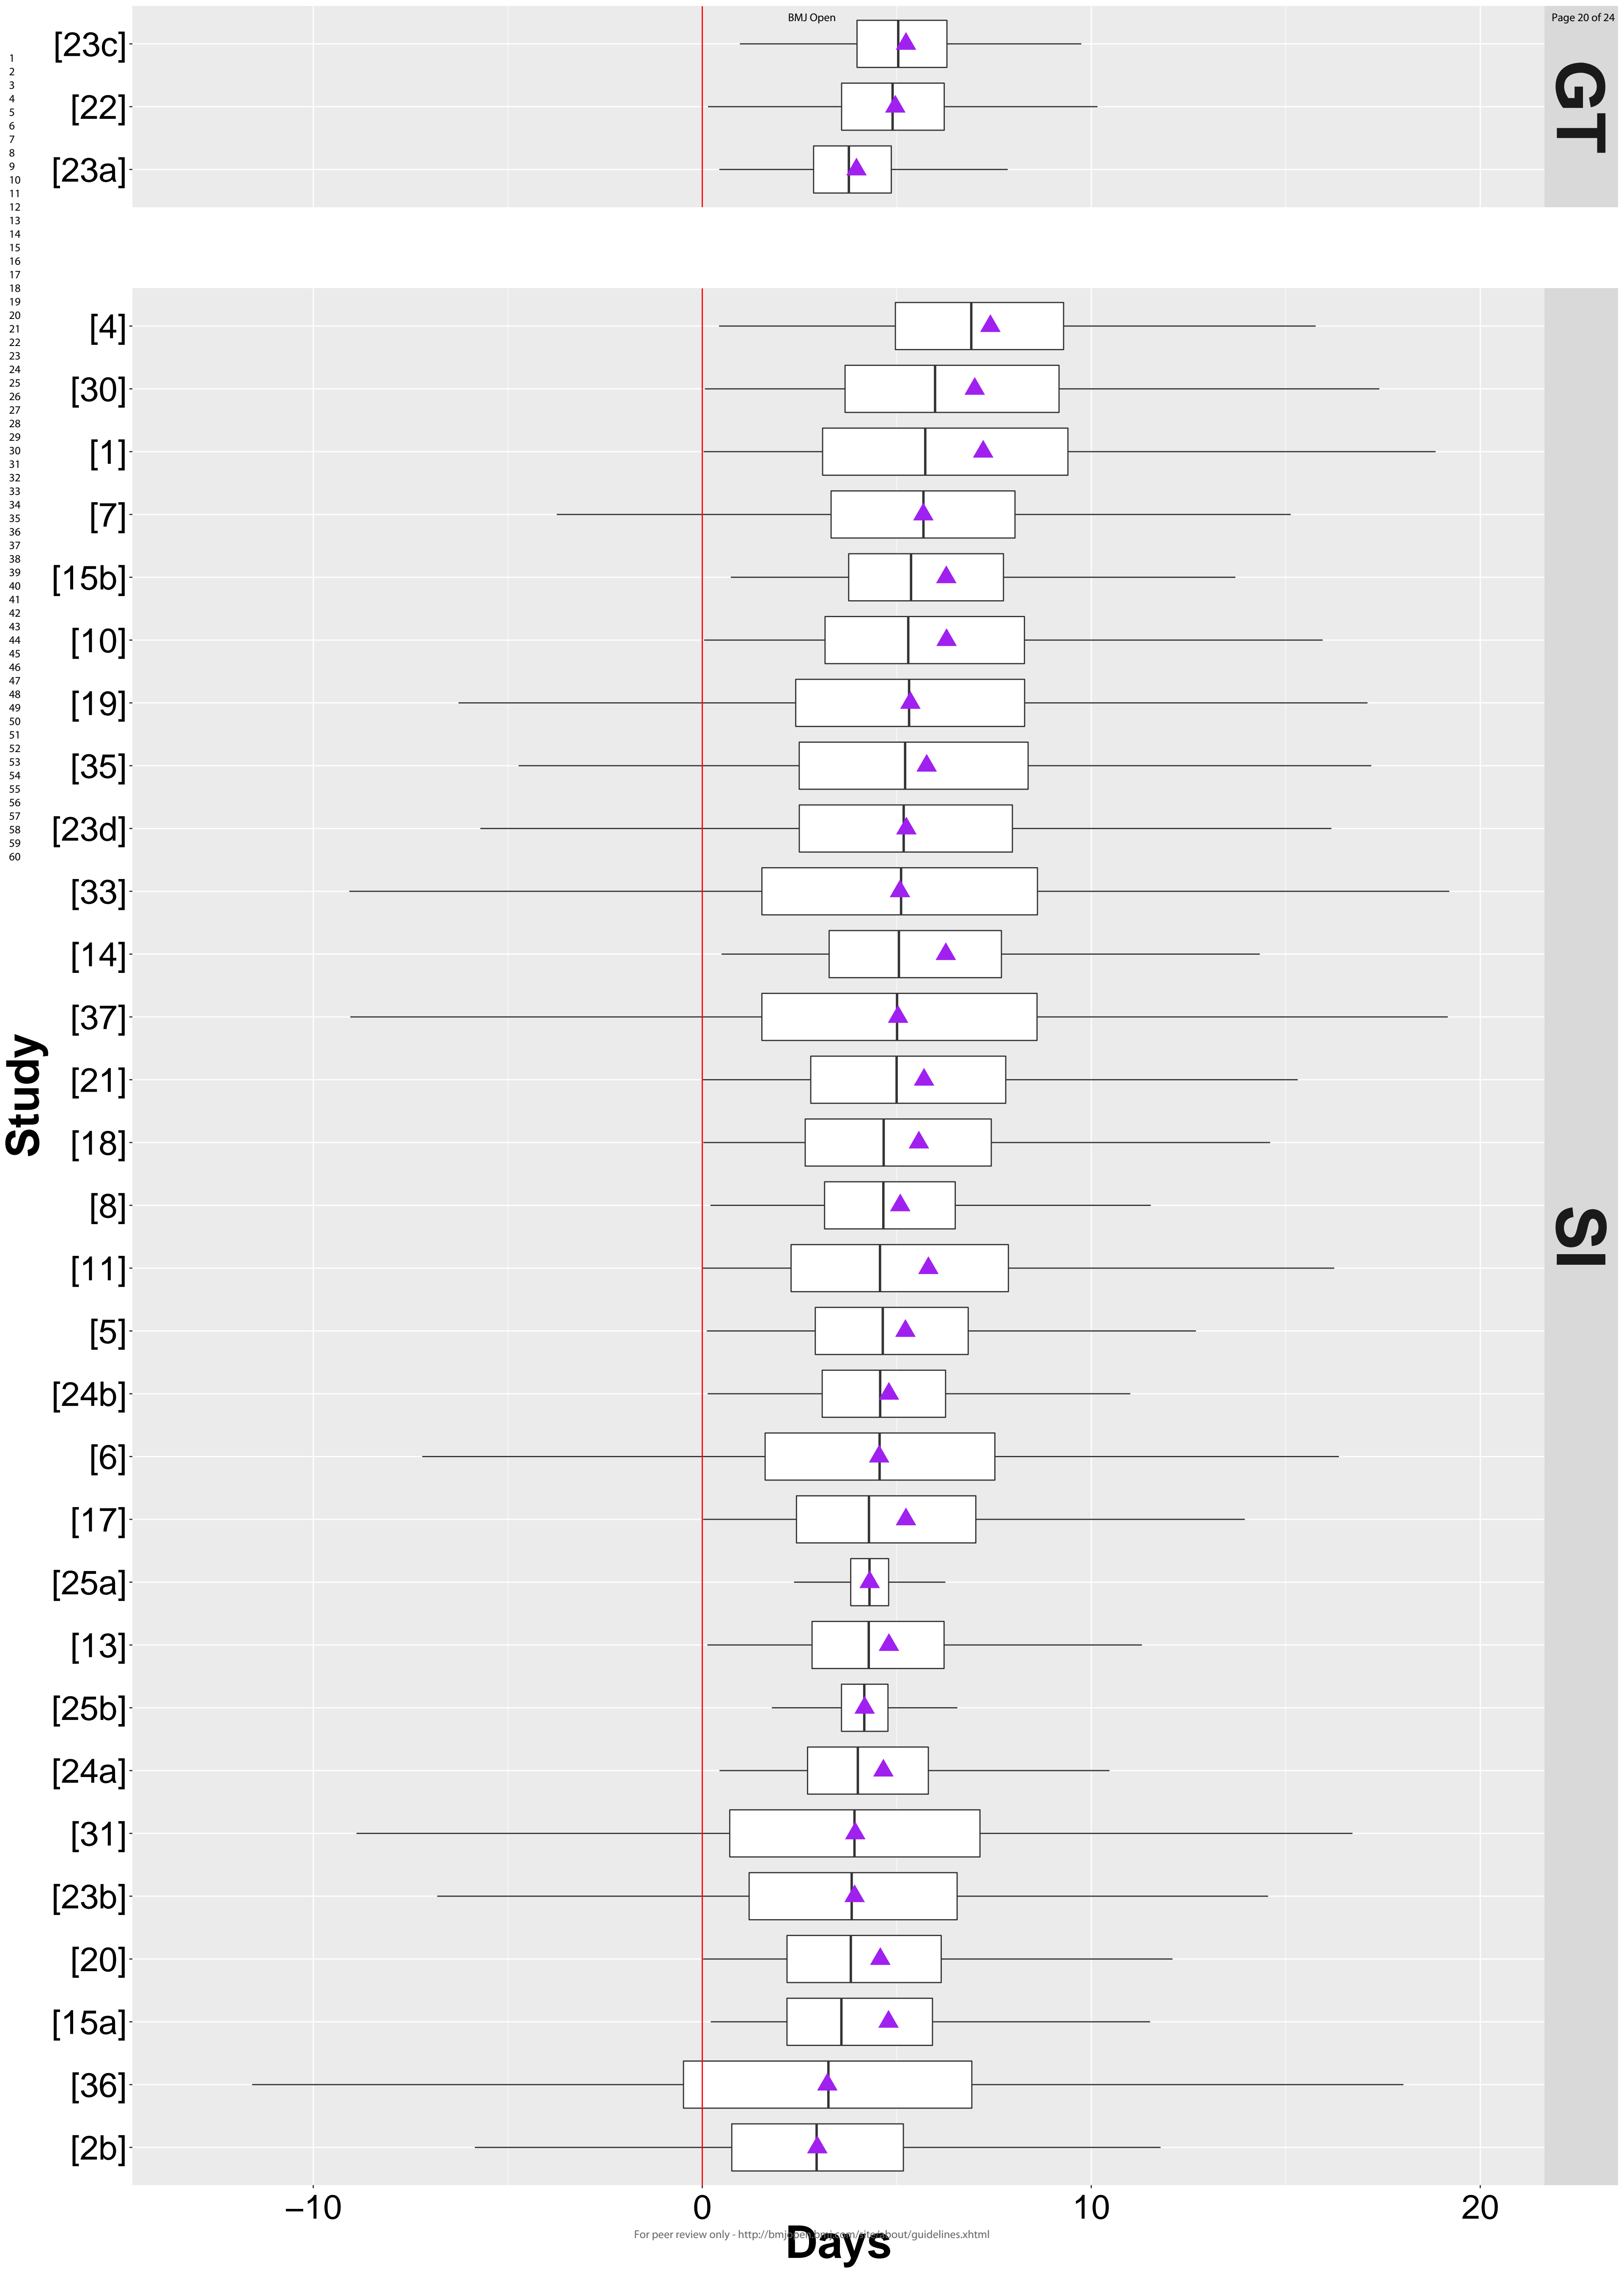

Study

SI

1  
2  
3  
4  
5  
6  
7  
8  
9  
10  
11  
12  
13  
14  
15  
16  
17  
18  
19  
20  
21  
22  
23  
24  
25  
26  
27  
28  
29  
30  
31  
32  
33  
34  
35  
36  
37  
38  
39  
40  
41  
42  
43  
44  
45  
46  
47  
48  
49  
50  
51  
52  
53  
54  
55  
56  
57  
58  
59  
60

**Supplementary table 1: A summary of the data available from the 40 papers included in the rapid systematic review.**

| <b>Data available</b>                                                                                      | <b>N papers</b> | <b>References</b>                        | <b>Comment</b>                                                                   |
|------------------------------------------------------------------------------------------------------------|-----------------|------------------------------------------|----------------------------------------------------------------------------------|
| Able to simulate SI or GT distribution                                                                     | 27              | 1-2,4-8,10-11,13-15,17-25,30-31,33,35-37 | 33 estimates from 27 papers. Plotted in Figure 2                                 |
| Information available to simulate distribution but could not replicate summary statistics in the paper     | 2               | 34,39                                    | Extracted underlying data but could not replicate summary statistics from either |
| Reported fitting a distribution but not enough information available to simulate it.                       | 1               | 16                                       | Partial underlying data extracted                                                |
| Distribution not fitted but underlying data available                                                      | 7               | 3,9,26,27,28,32,40                       | Could not replicate summary statistics for Ki [26]                               |
| Distribution not fitted and unable to extract underlying data but plot of distribution available in paper. | 2               | 29,38                                    |                                                                                  |
| Distribution not fitted, unable to extract underlying data and no plot of distribution available in paper. | 1               | 12                                       |                                                                                  |
| <b>TOTAL</b>                                                                                               | <b>40</b>       |                                          |                                                                                  |

1  
2  
3  
4  
5  
6  
7  
8  
9  
10  
11  
12  
13  
14  
15  
16  
17  
18  
19  
20  
21  
22  
23  
24  
25  
26  
27  
28  
29  
30  
31  
32  
33  
34  
35  
36  
37  
38  
39  
40  
41  
42  
43  
44  
45  
46  
47  
48  
49  
50  
51  
52  
53  
54  
55  
56  
57  
58  
59  
60

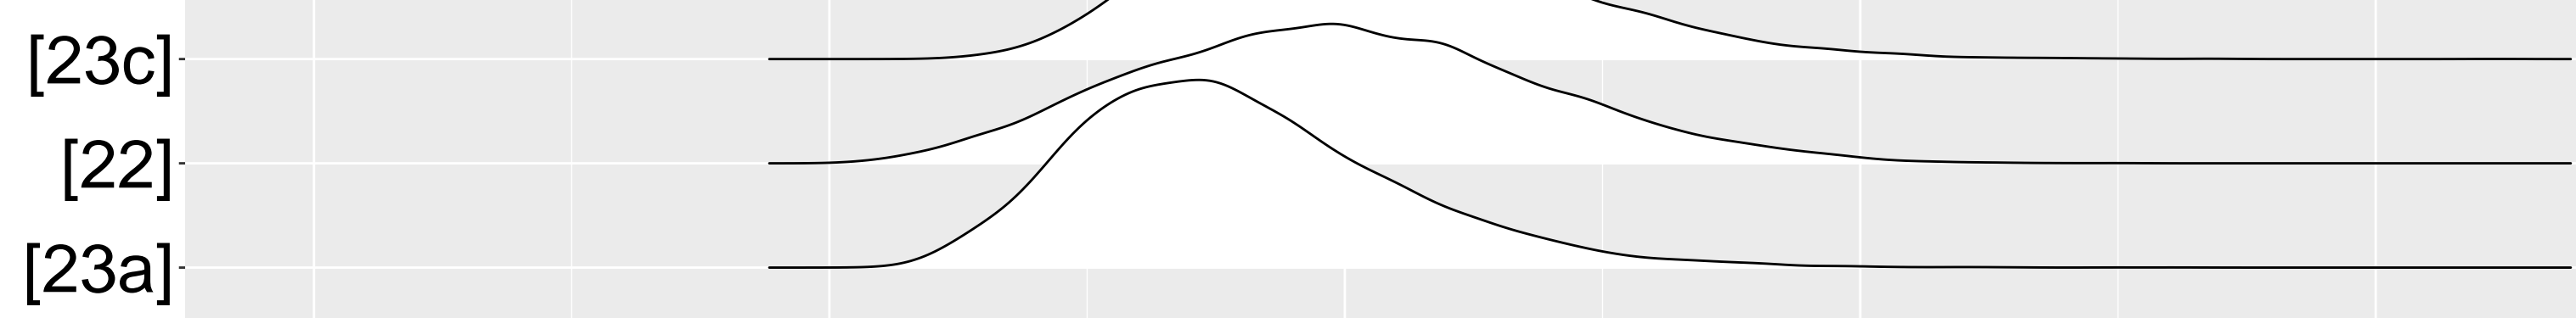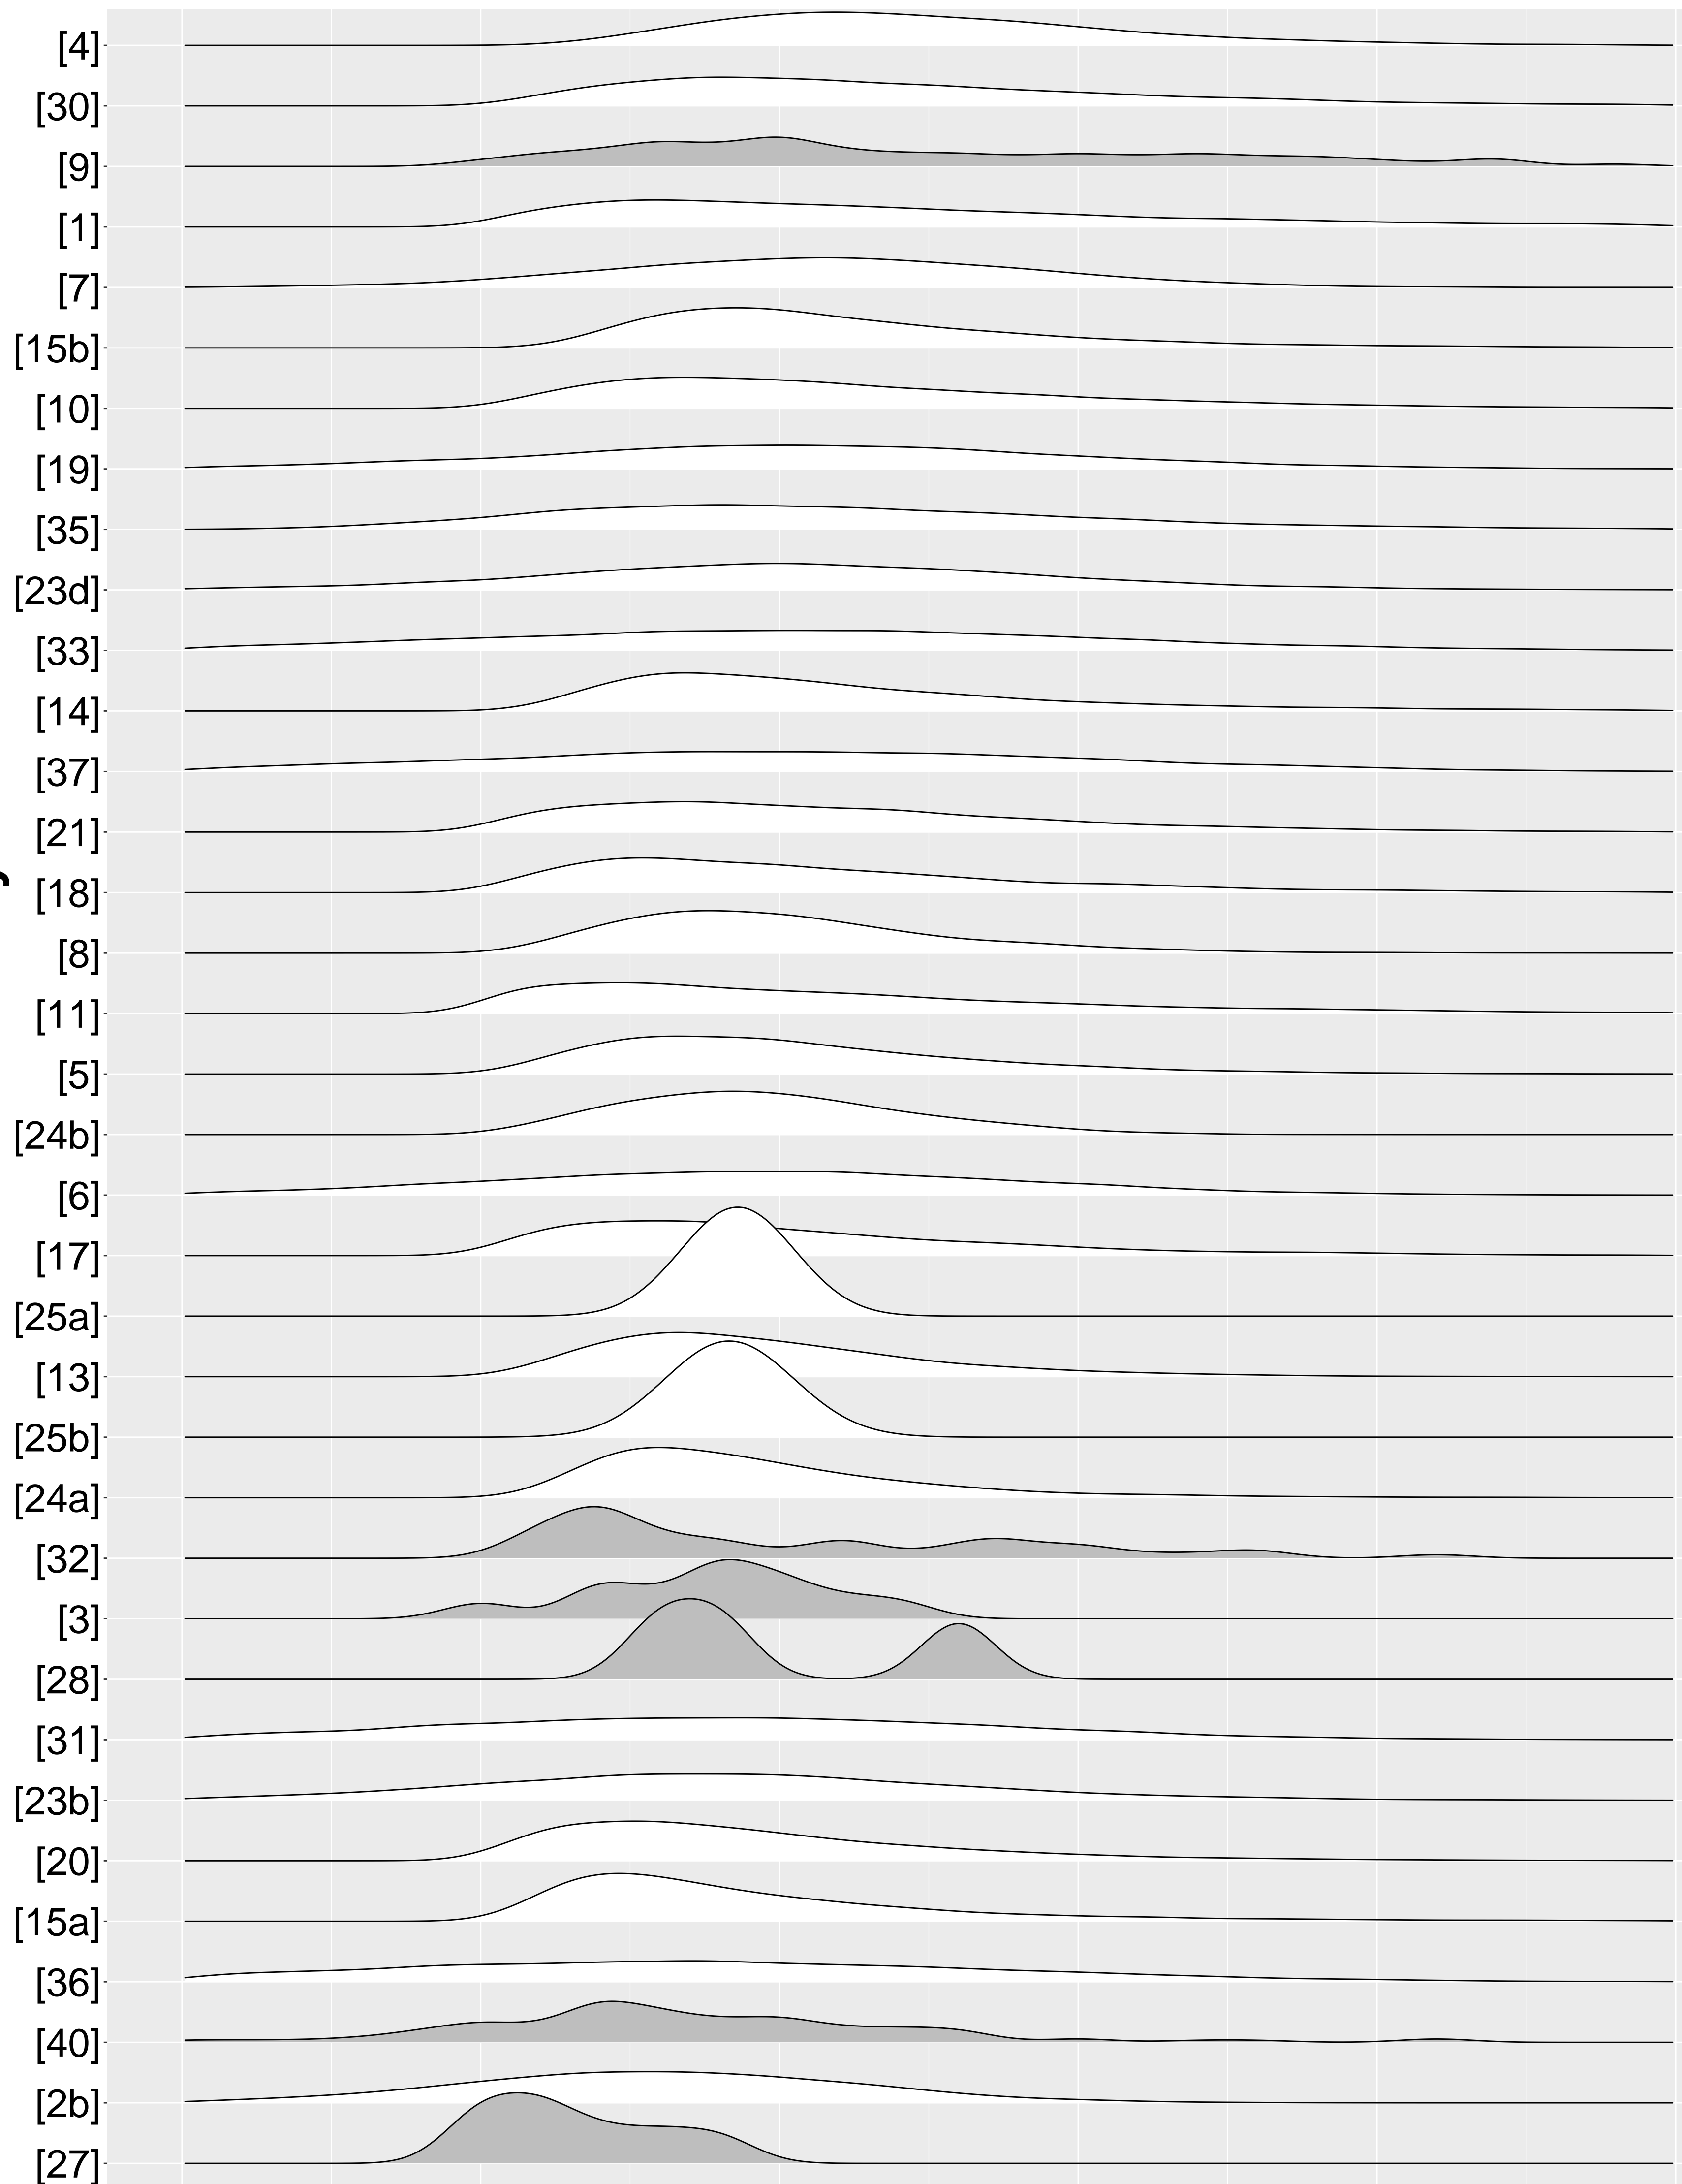

-5 0 5 10 15 20



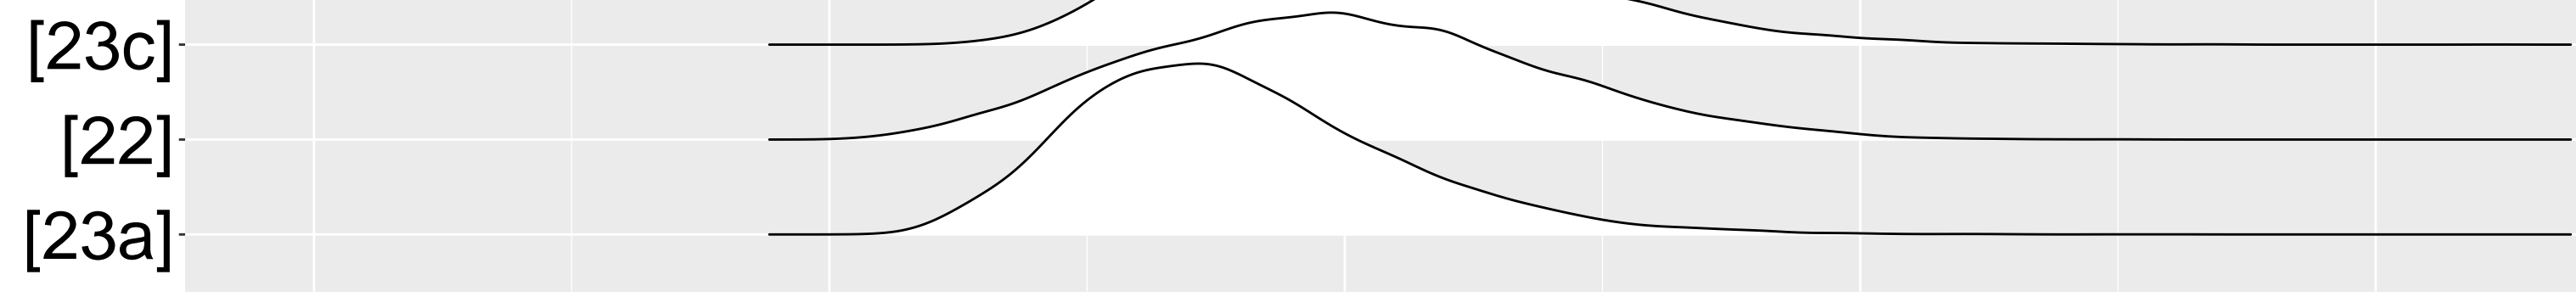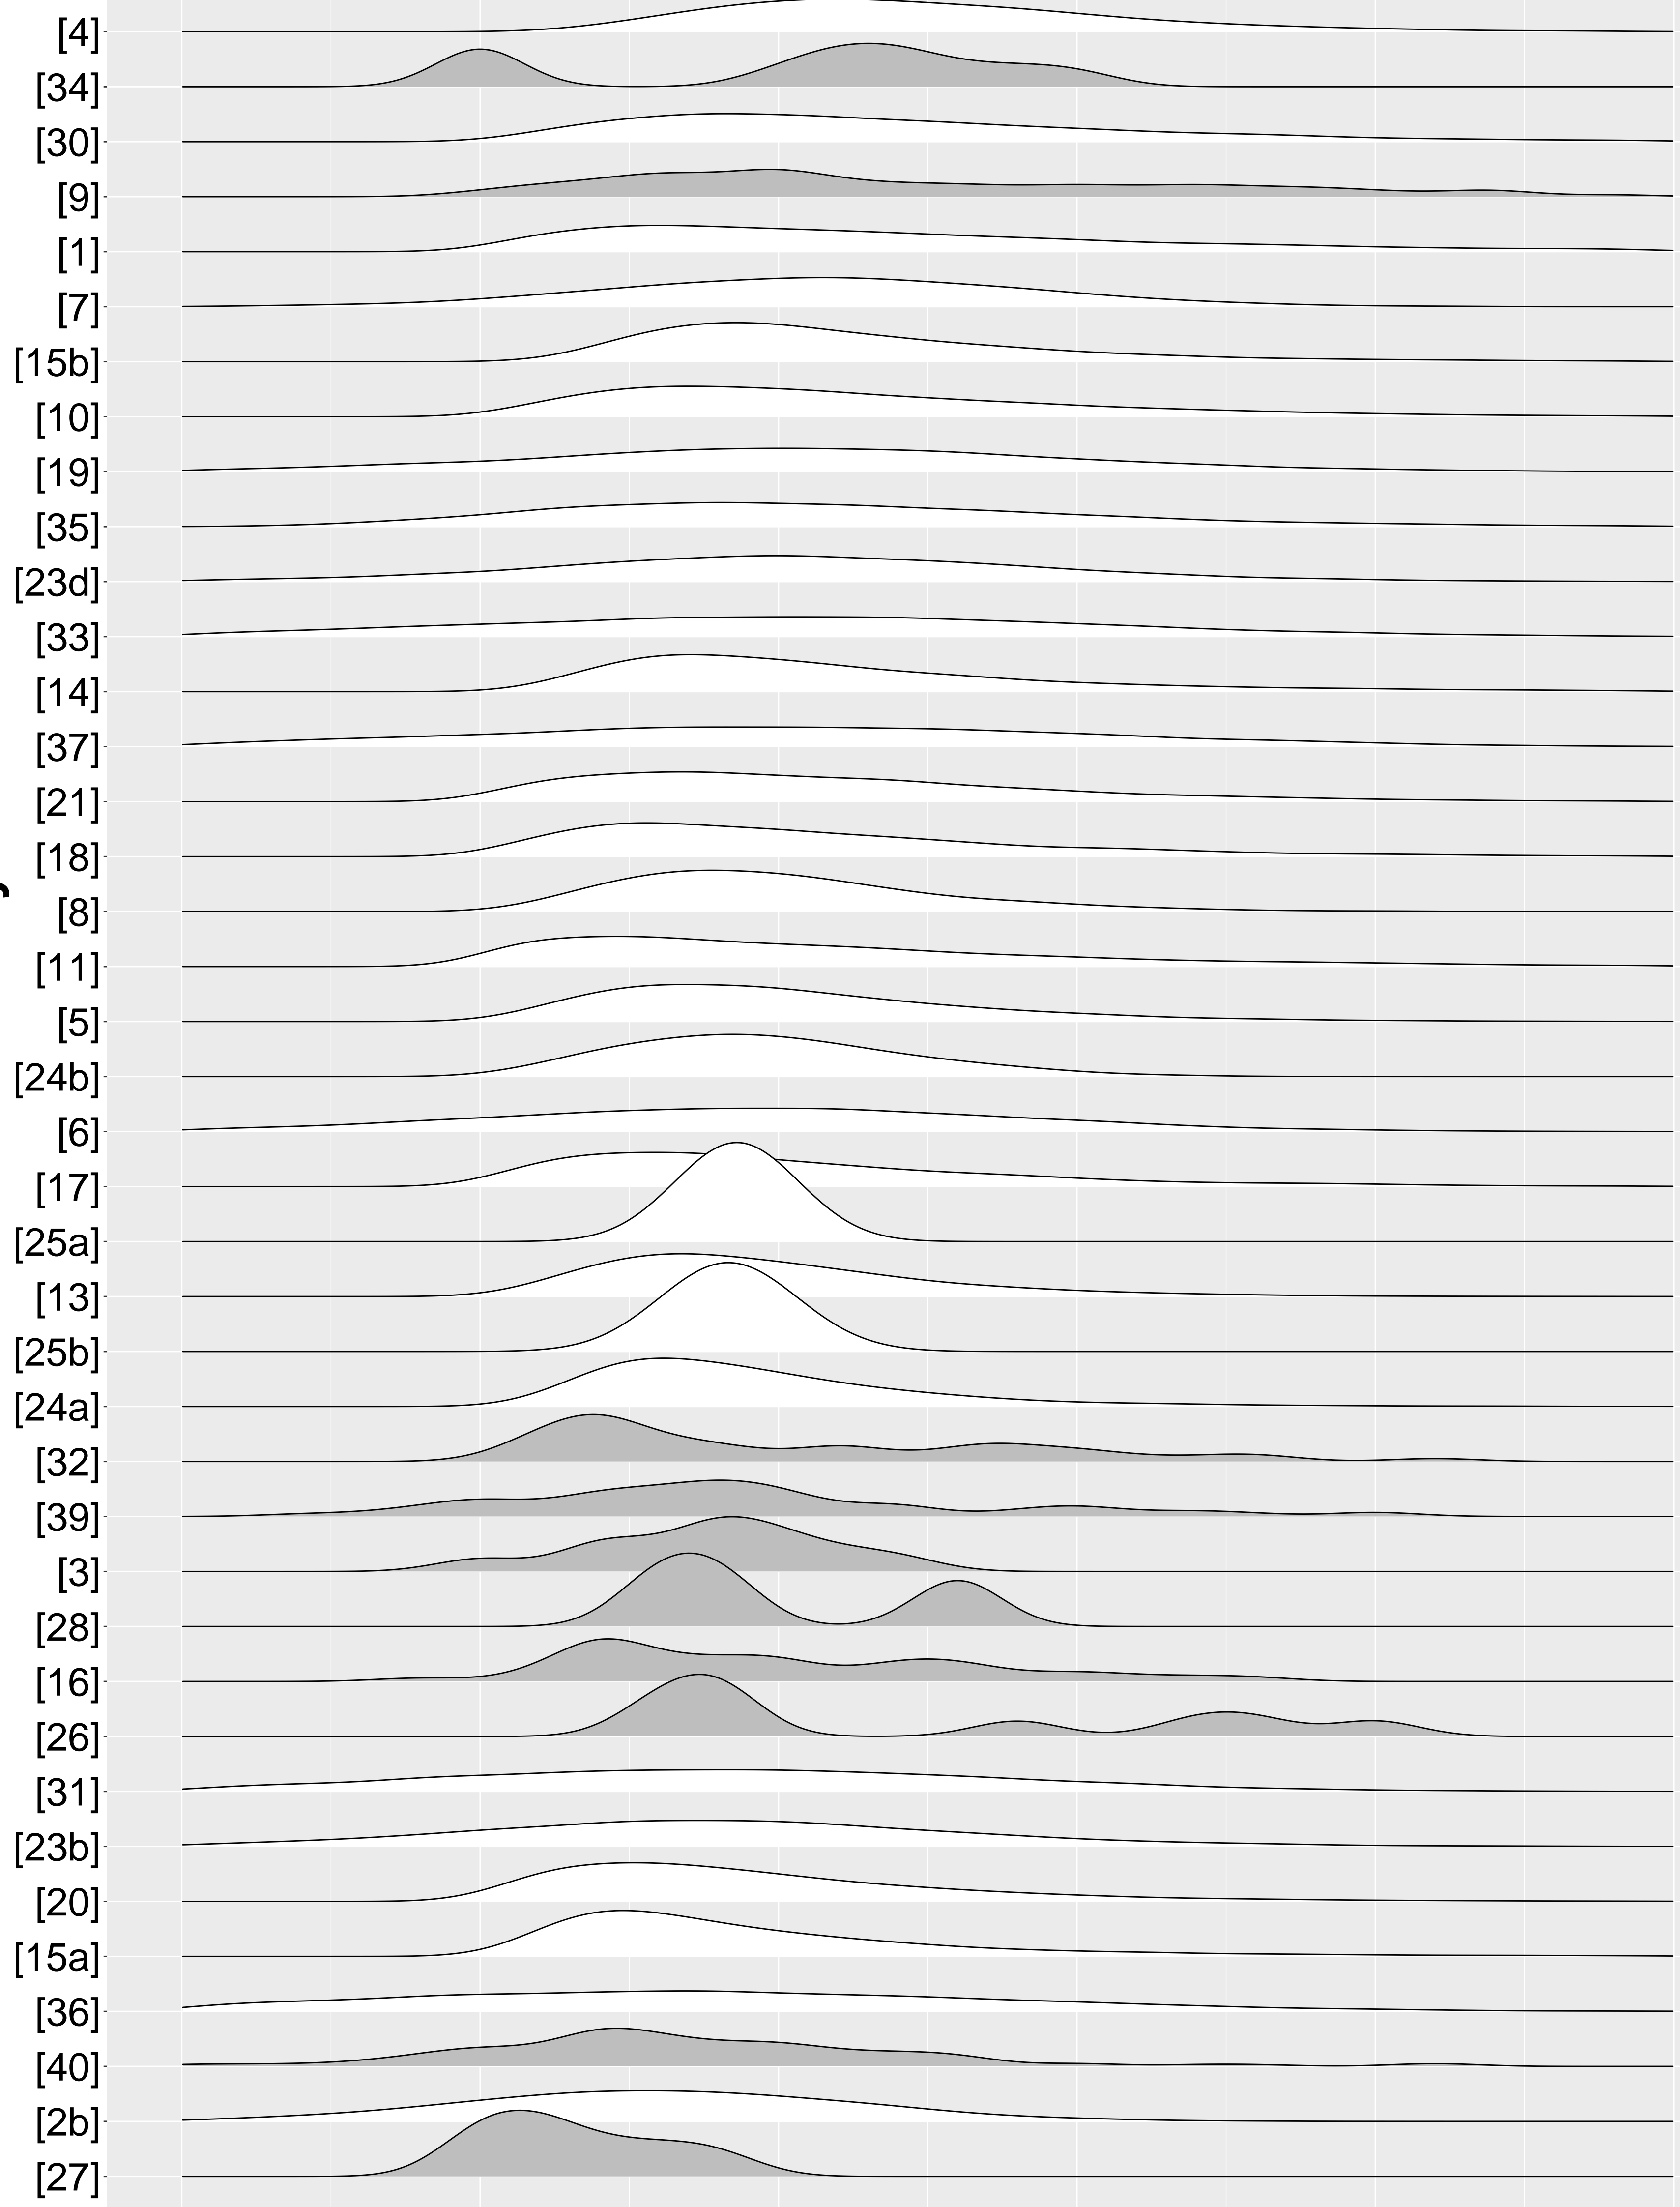

Study

-5 0 5 10 15 20

Days

## Preferred Reporting Items for Systematic reviews and Meta-Analyses extension for Scoping Reviews (PRISMA-ScR) Checklist

| SECTION                                               | ITEM | PRISMA-ScR CHECKLIST ITEM                                                                                                                                                                                                                                                                                  | REPORTED ON PAGE # |
|-------------------------------------------------------|------|------------------------------------------------------------------------------------------------------------------------------------------------------------------------------------------------------------------------------------------------------------------------------------------------------------|--------------------|
| <b>TITLE</b>                                          |      |                                                                                                                                                                                                                                                                                                            |                    |
| Title                                                 | 1    | Identify the report as a scoping review.                                                                                                                                                                                                                                                                   |                    |
| <b>ABSTRACT</b>                                       |      |                                                                                                                                                                                                                                                                                                            |                    |
| Structured summary                                    | 2    | Provide a structured summary that includes (as applicable): background, objectives, eligibility criteria, sources of evidence, charting methods, results, and conclusions that relate to the review questions and objectives.                                                                              |                    |
| <b>INTRODUCTION</b>                                   |      |                                                                                                                                                                                                                                                                                                            |                    |
| Rationale                                             | 3    | Describe the rationale for the review in the context of what is already known. Explain why the review questions/objectives lend themselves to a scoping review approach.                                                                                                                                   |                    |
| Objectives                                            | 4    | Provide an explicit statement of the questions and objectives being addressed with reference to their key elements (e.g., population or participants, concepts, and context) or other relevant key elements used to conceptualize the review questions and/or objectives.                                  |                    |
| <b>METHODS</b>                                        |      |                                                                                                                                                                                                                                                                                                            |                    |
| Protocol and registration                             | 5    | Indicate whether a review protocol exists; state if and where it can be accessed (e.g., a Web address); and if available, provide registration information, including the registration number.                                                                                                             |                    |
| Eligibility criteria                                  | 6    | Specify characteristics of the sources of evidence used as eligibility criteria (e.g., years considered, language, and publication status), and provide a rationale.                                                                                                                                       |                    |
| Information sources*                                  | 7    | Describe all information sources in the search (e.g., databases with dates of coverage and contact with authors to identify additional sources), as well as the date the most recent search was executed.                                                                                                  |                    |
| Search                                                | 8    | Present the full electronic search strategy for at least 1 database, including any limits used, such that it could be repeated.                                                                                                                                                                            |                    |
| Selection of sources of evidence†                     | 9    | State the process for selecting sources of evidence (i.e., screening and eligibility) included in the scoping review.                                                                                                                                                                                      |                    |
| Data charting process‡                                | 10   | Describe the methods of charting data from the included sources of evidence (e.g., calibrated forms or forms that have been tested by the team before their use, and whether data charting was done independently or in duplicate) and any processes for obtaining and confirming data from investigators. |                    |
| Data items                                            | 11   | List and define all variables for which data were sought and any assumptions and simplifications made.                                                                                                                                                                                                     |                    |
| Critical appraisal of individual sources of evidence§ | 12   | If done, provide a rationale for conducting a critical appraisal of included sources of evidence; describe the methods used and how this information was used in any data synthesis (if appropriate).                                                                                                      |                    |
| Synthesis of results                                  | 13   | Describe the methods of handling and summarizing the data that were charted.                                                                                                                                                                                                                               |                    |



| SECTION                                       | ITEM | PRISMA-ScR CHECKLIST ITEM                                                                                                                                                                       | REPORTED ON PAGE # |
|-----------------------------------------------|------|-------------------------------------------------------------------------------------------------------------------------------------------------------------------------------------------------|--------------------|
| <b>RESULTS</b>                                |      |                                                                                                                                                                                                 |                    |
| Selection of sources of evidence              | 14   | Give numbers of sources of evidence screened, assessed for eligibility, and included in the review, with reasons for exclusions at each stage, ideally using a flow diagram.                    |                    |
| Characteristics of sources of evidence        | 15   | For each source of evidence, present characteristics for which data were charted and provide the citations.                                                                                     |                    |
| Critical appraisal within sources of evidence | 16   | If done, present data on critical appraisal of included sources of evidence (see item 12).                                                                                                      |                    |
| Results of individual sources of evidence     | 17   | For each included source of evidence, present the relevant data that were charted that relate to the review questions and objectives.                                                           |                    |
| Synthesis of results                          | 18   | Summarize and/or present the charting results as they relate to the review questions and objectives.                                                                                            |                    |
| <b>DISCUSSION</b>                             |      |                                                                                                                                                                                                 |                    |
| Summary of evidence                           | 19   | Summarize the main results (including an overview of concepts, themes, and types of evidence available), link to the review questions and objectives, and consider the relevance to key groups. |                    |
| Limitations                                   | 20   | Discuss the limitations of the scoping review process.                                                                                                                                          |                    |
| Conclusions                                   | 21   | Provide a general interpretation of the results with respect to the review questions and objectives, as well as potential implications and/or next steps.                                       |                    |
| <b>FUNDING</b>                                |      |                                                                                                                                                                                                 |                    |
| Funding                                       | 22   | Describe sources of funding for the included sources of evidence, as well as sources of funding for the scoping review. Describe the role of the funders of the scoping review.                 |                    |

JBI = Joanna Briggs Institute; PRISMA-ScR = Preferred Reporting Items for Systematic reviews and Meta-Analyses extension for Scoping Reviews.

\* Where *sources of evidence* (see second footnote) are compiled from, such as bibliographic databases, social media platforms, and Web sites.

† A more inclusive/heterogeneous term used to account for the different types of evidence or data sources (e.g., quantitative and/or qualitative research, expert opinion, and policy documents) that may be eligible in a scoping review as opposed to only studies. This is not to be confused with *information sources* (see first footnote).

‡ The frameworks by Arksey and O'Malley (6) and Levac and colleagues (7) and the JBI guidance (4, 5) refer to the process of data extraction in a scoping review as data charting.

§ The process of systematically examining research evidence to assess its validity, results, and relevance before using it to inform a decision. This term is used for items 12 and 19 instead of "risk of bias" (which is more applicable to systematic reviews of interventions) to include and acknowledge the various sources of evidence that may be used in a scoping review (e.g., quantitative and/or qualitative research, expert opinion, and policy document).

From: Tricco AC, Lillie E, Zarin W, O'Brien KK, Colquhoun H, Levac D, et al. PRISMA Extension for Scoping Reviews (PRISMA-ScR): Checklist and Explanation. *Ann Intern Med.* 2018;169:467–473. doi: [10.7326/M18-0850](https://doi.org/10.7326/M18-0850).

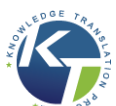

Supplement: bmjopen-2020-040263.draft_revisions.pdf [file bmjopen-2020-040263.draft_revisions.pdf]
