# Supplementary material for: Rapid review of available evidence on the serial interval and generation time of COVID-19
Source: PubMed Central journal article supplement — BMJ Open. 2020 Nov 23;10(11):e040263. doi: 10.1136/bmjopen-2020-040263 (PMC7684810; doi:10.1136/bmjopen-2020-040263), 2020-11-23
Supplement: bmjopen-2020-040263supp001.pdf [file bmjopen-2020-040263supp001.pdf]

**Supplementary table 1: A summary of the data available from the 40 papers included in the rapid systematic review.**

| <b>Data available</b>                                                                                                              | <b>N papers</b> | <b>References</b>                           | <b>Comment</b>                                                        |
|------------------------------------------------------------------------------------------------------------------------------------|-----------------|---------------------------------------------|-----------------------------------------------------------------------|
| Able to simulate SI or GT distribution                                                                                             | 28              | 1-2,4-8,10-11,13-15,17-25,30-31,33,35-37,39 | 34 estimates from 28 papers. Plotted in Figure 2.                     |
| Information available to simulate distribution but could not replicate summary statistics in the paper                             | 1               | 34                                          | Extracted underlying data but could not replicate summary statistics. |
| Reported fitting a distribution but not enough information available to simulate it.                                               | 1               | 16                                          | Partial underlying data extracted                                     |
| Distribution not fitted but underlying data available                                                                              | 7               | 3,9,26,27,28,32,40                          | Could not replicate summary statistics for (Ki & 2019-nCoV, 2020)     |
| Distribution not fitted and unable to extract underlying data but histograms representing serial interval data available in paper. | 2               | 29,38                                       |                                                                       |
| Distribution not fitted, unable to extract underlying data and no plot of distribution available in paper.                         | 1               | 12                                          |                                                                       |
| <b>TOTAL</b>                                                                                                                       | <b>40</b>       |                                             |                                                                       |
