# Supplementary figures and images for: Rapid review of available evidence on the serial interval and generation time of COVID-19
Source: PubMed Central journal article supplement — BMJ Open. 2020 Nov 23;10(11):e040263. doi: 10.1136/bmjopen-2020-040263 (PMC7684810; doi:10.1136/bmjopen-2020-040263), 2020-11-23

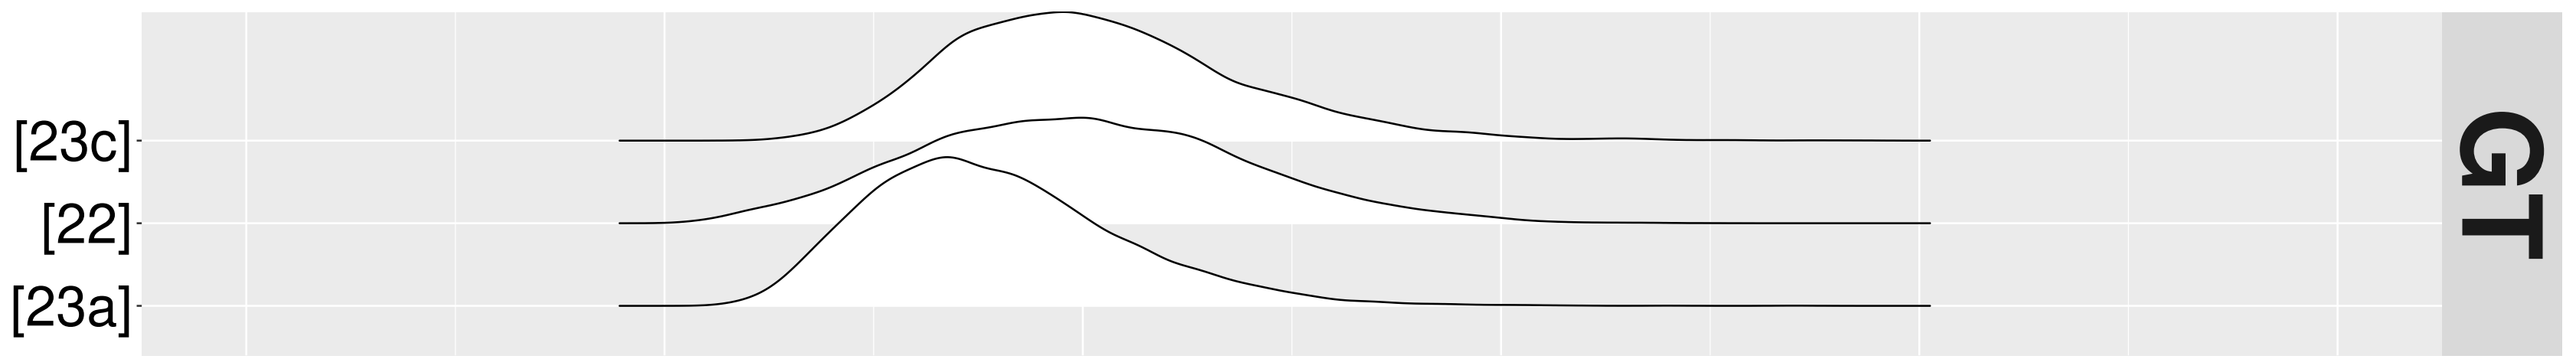

GT

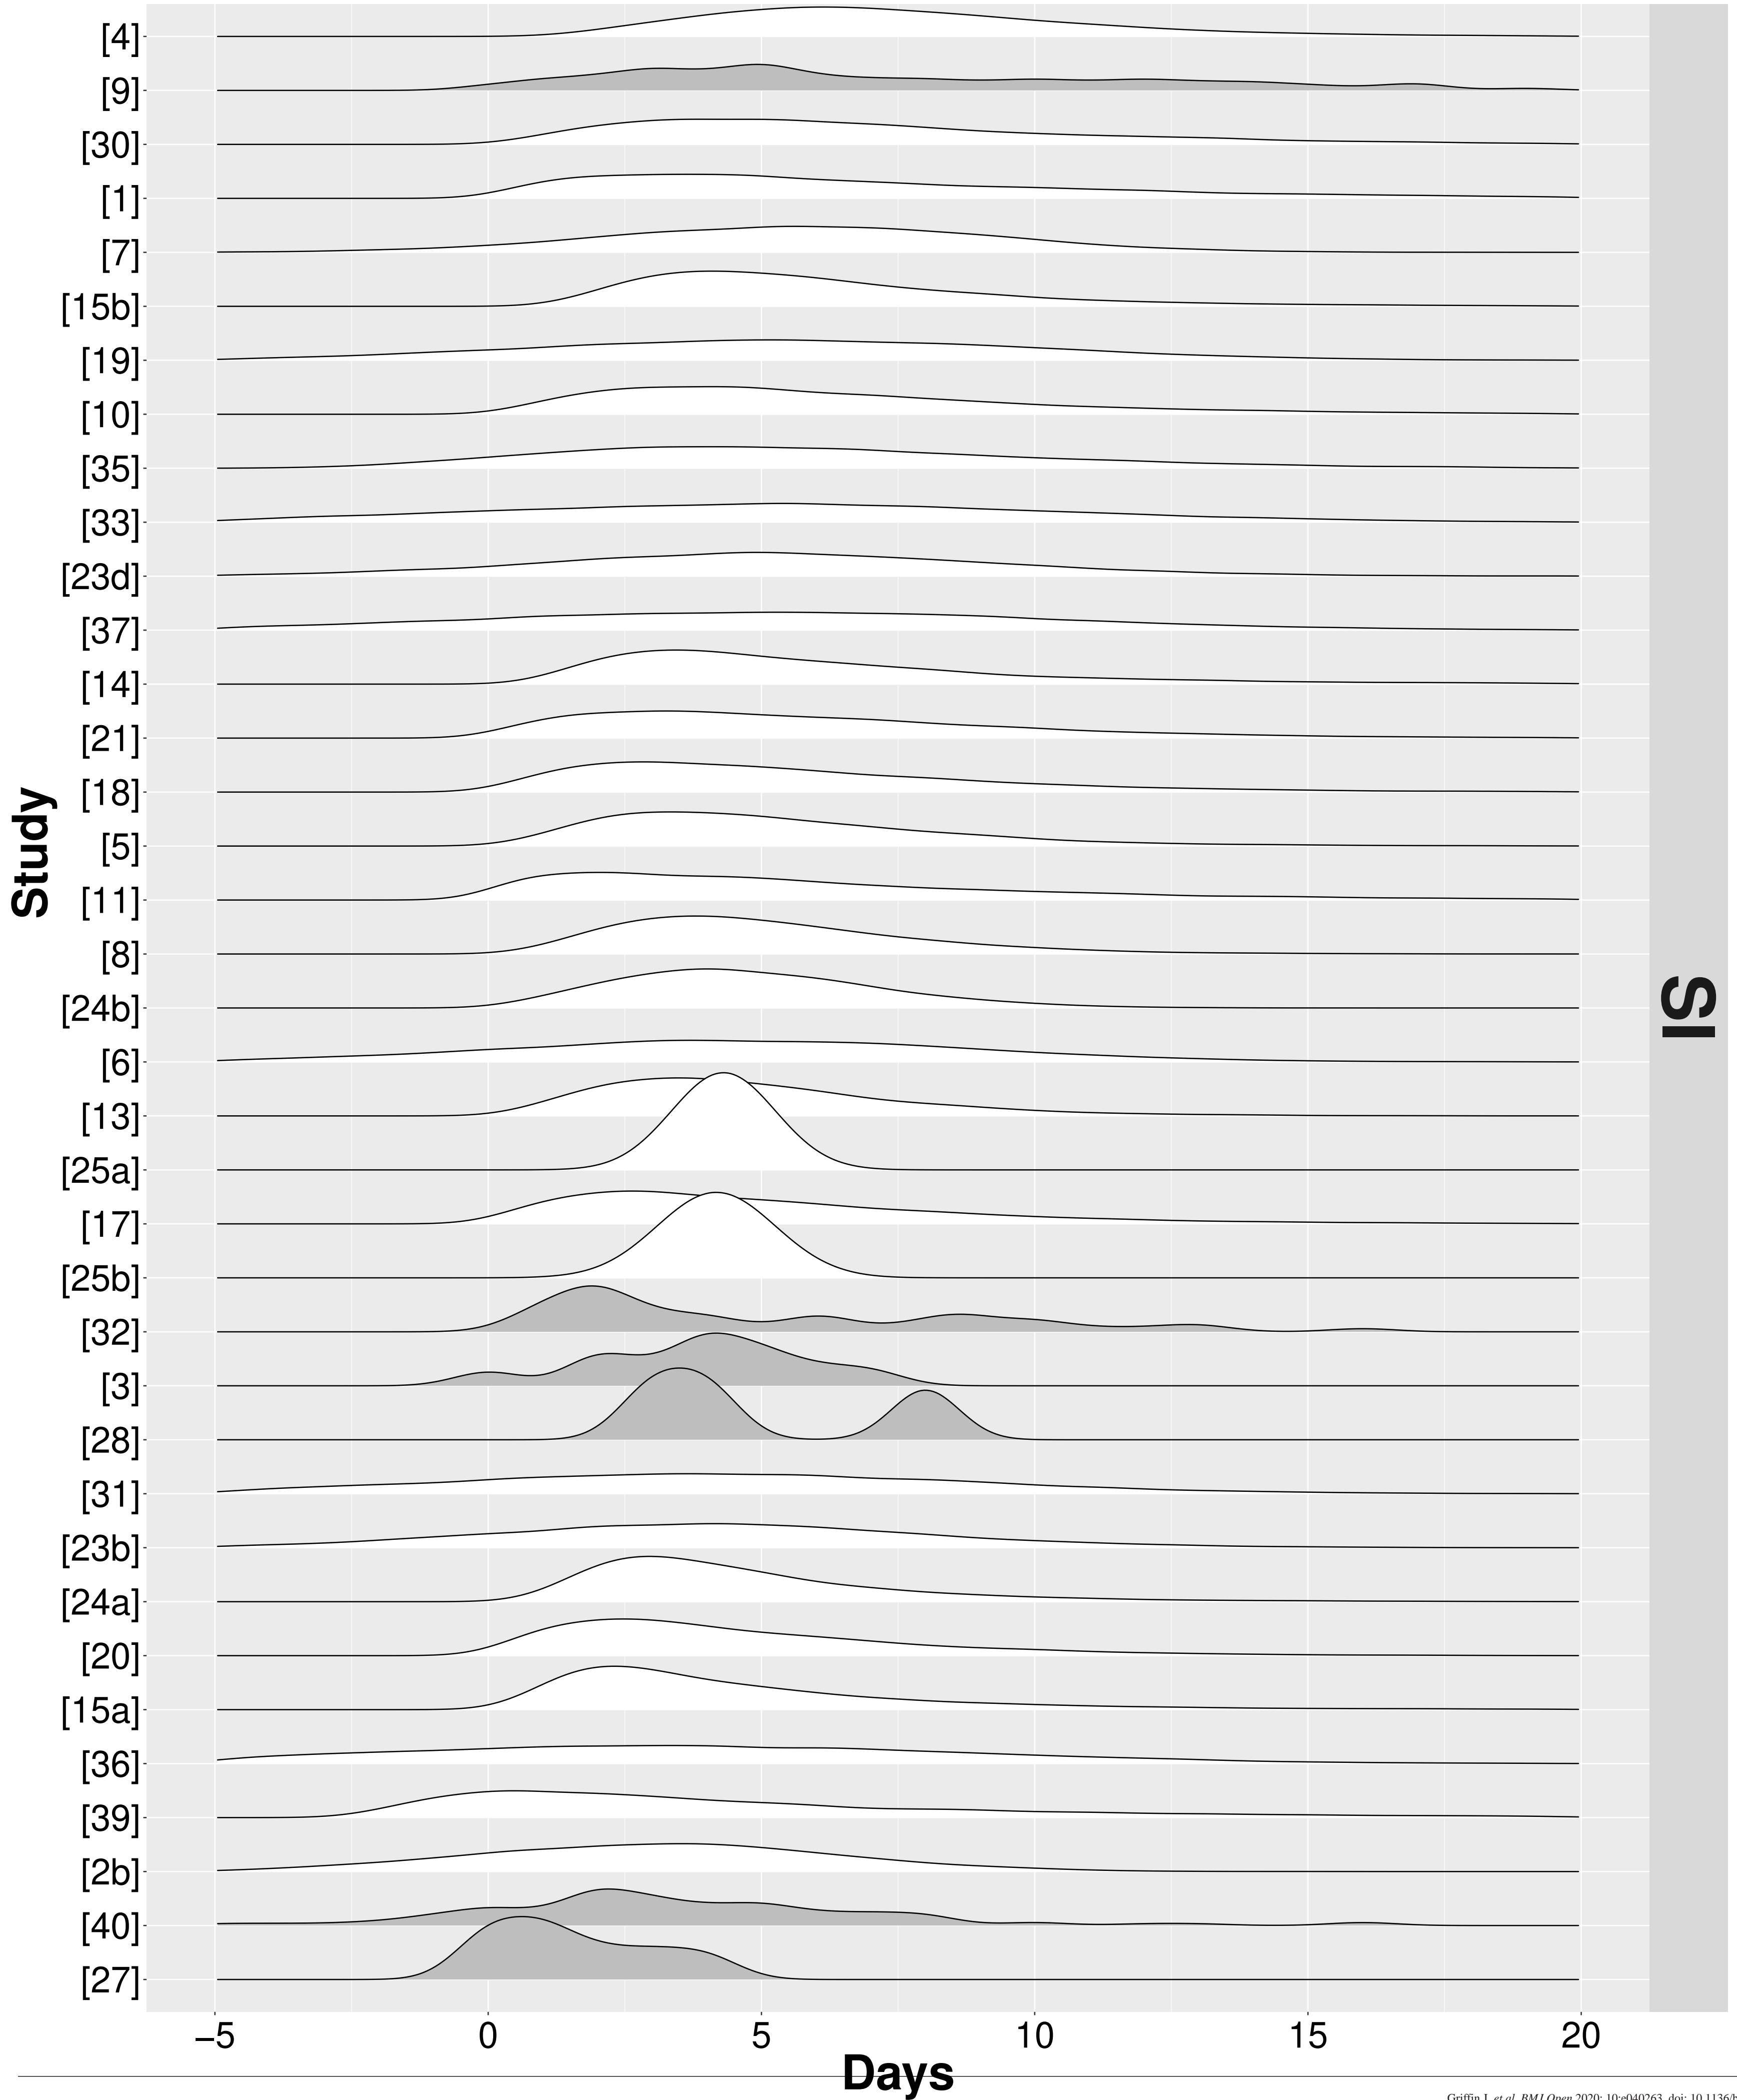

SI

Study

Days

Supplement: bmjopen-2020-040263supp002.pdf [file bmjopen-2020-040263supp002.pdf]

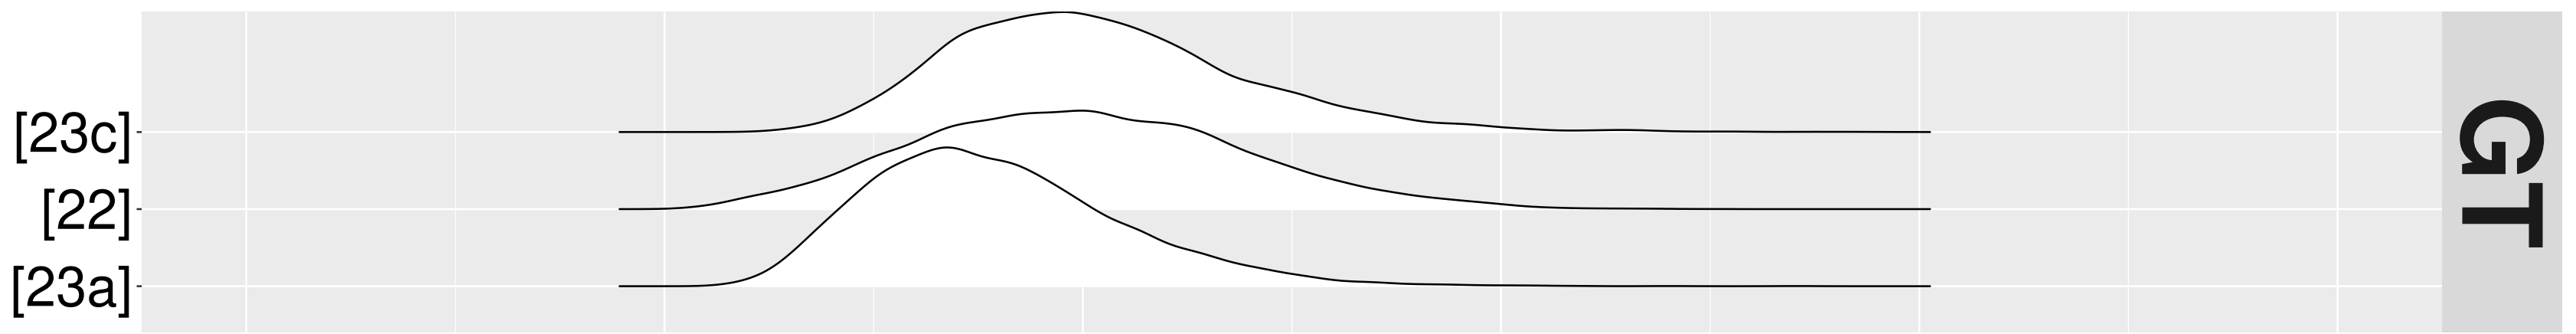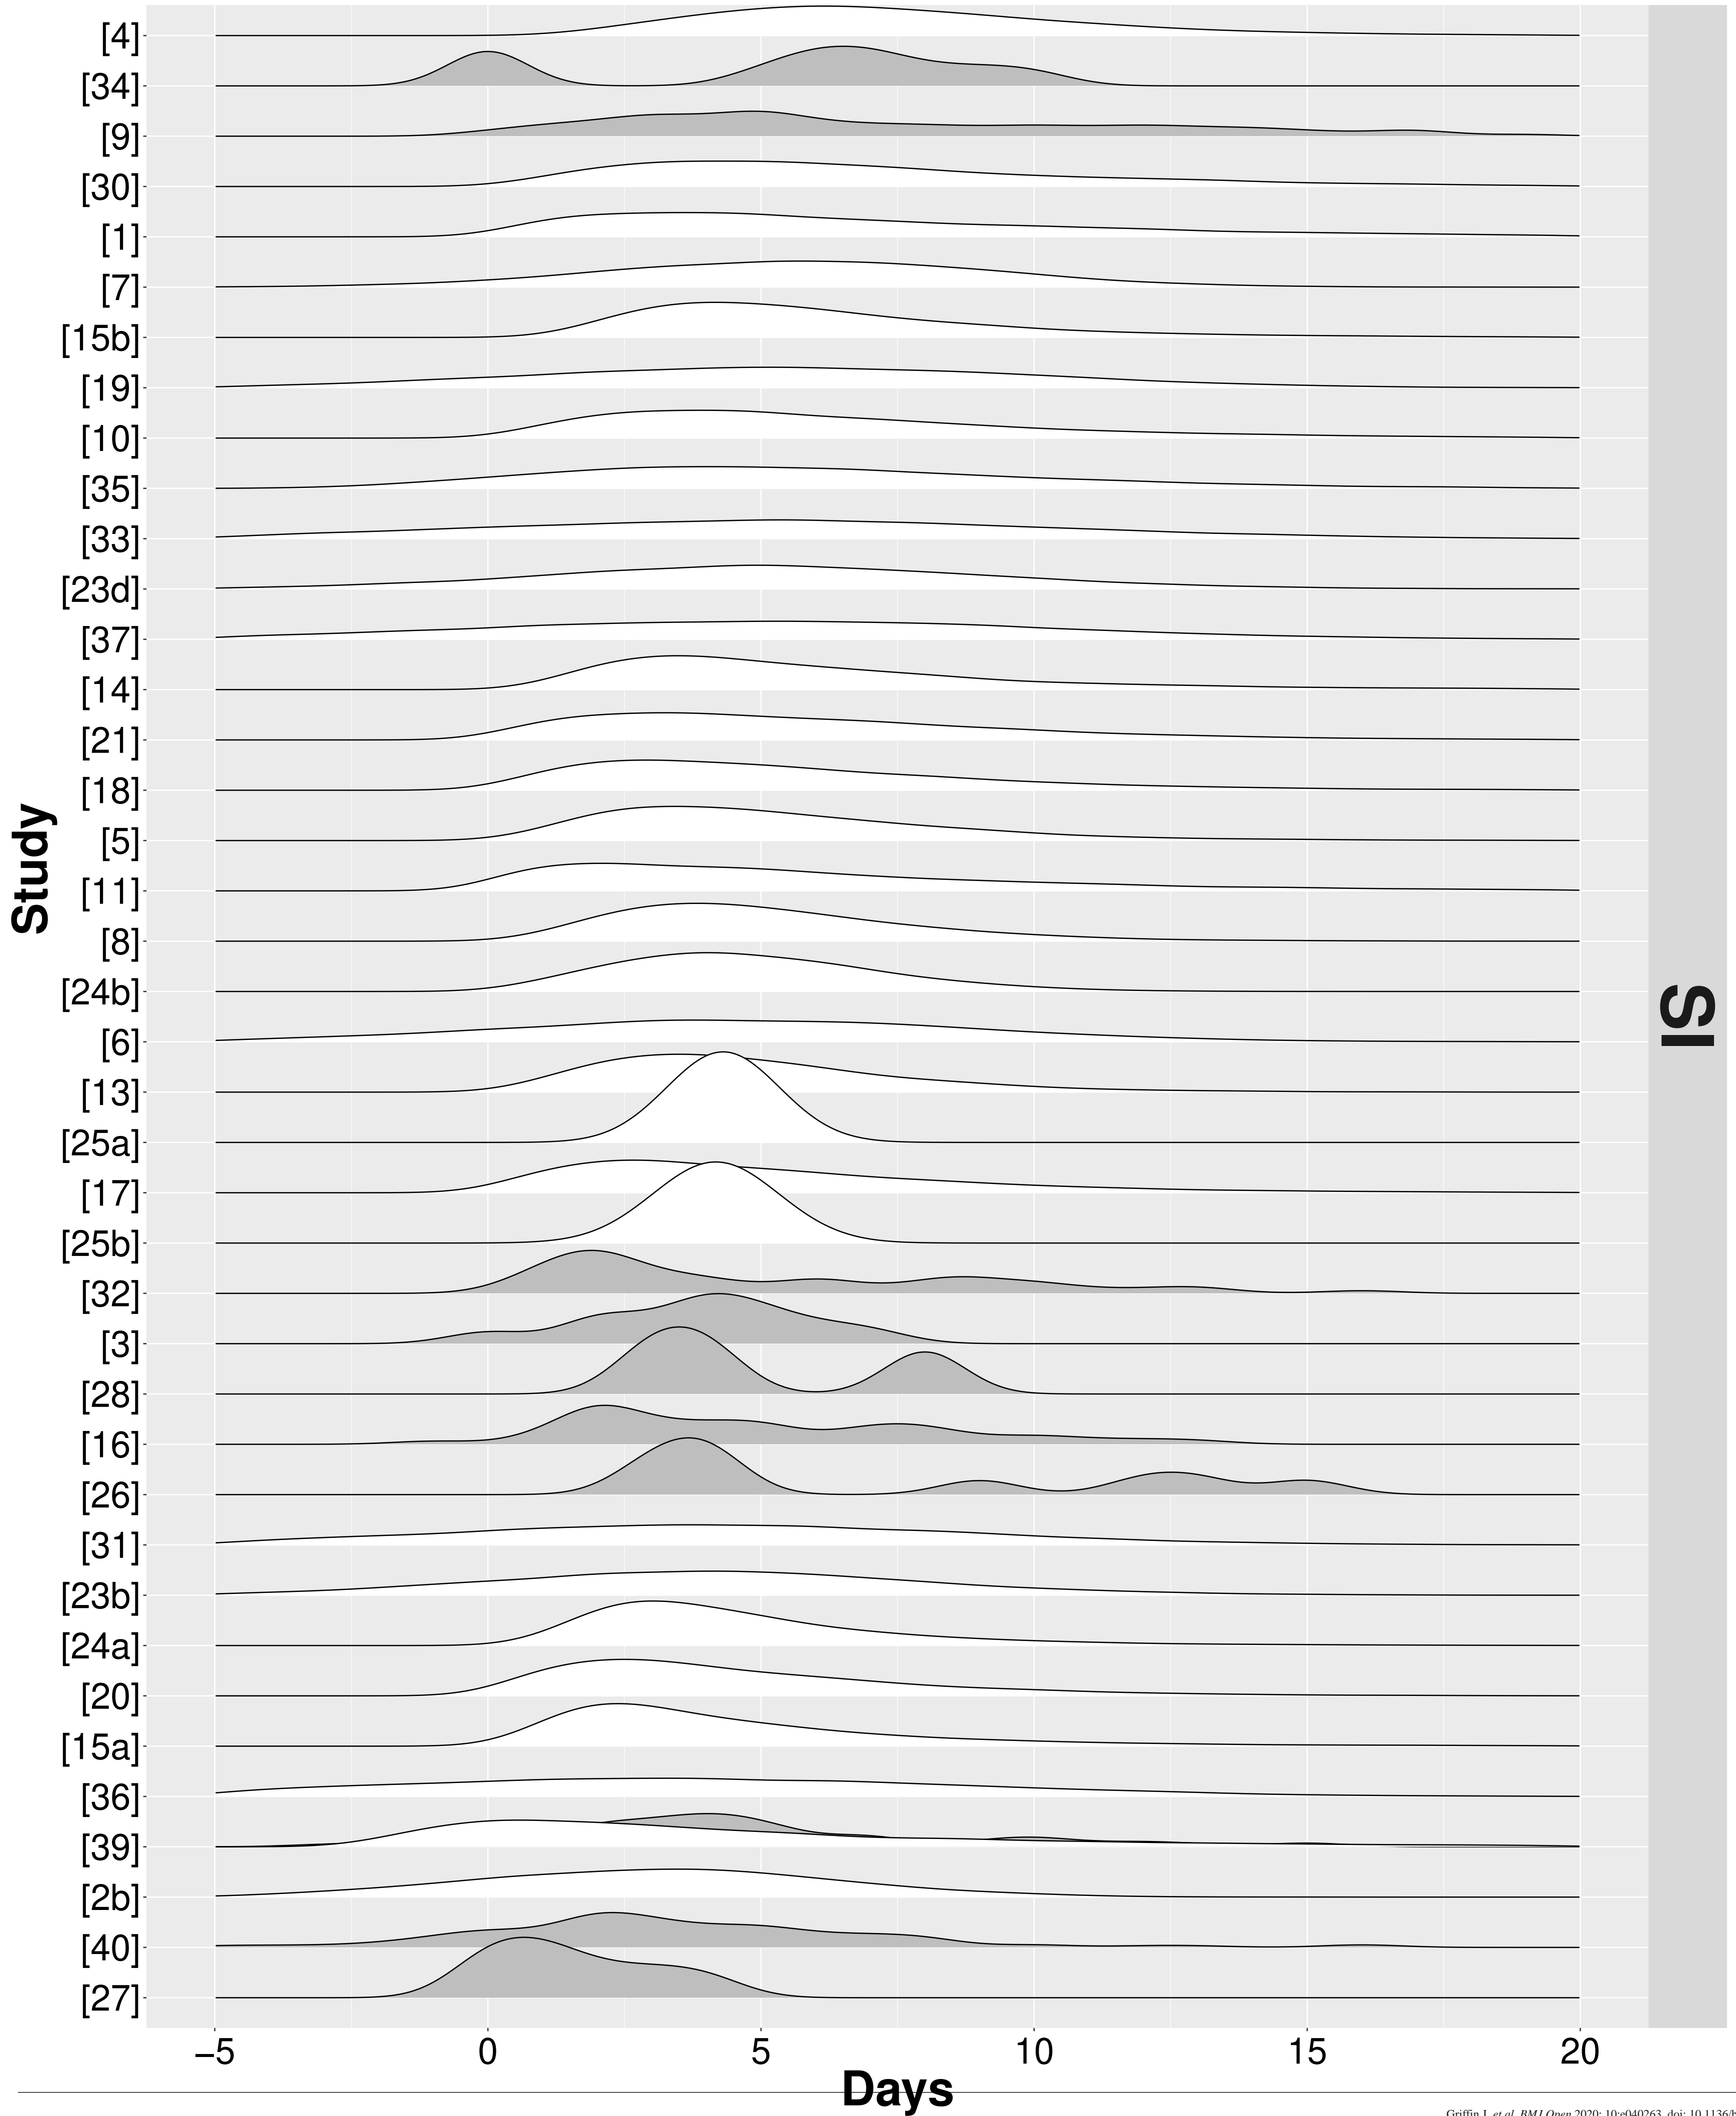

Supplement: bmjopen-2020-040263supp003.pdf [file bmjopen-2020-040263supp003.pdf]
